# Supplementary material for: A multivariate insight into ionic liquids toxicities
Source: Royal Society of Chemistry journal article supplement (doi:10.1039/c4ra03230f), 2014-01-01
Supplement: c4ra03230f1.pdf [file c4ra03230f1.pdf]

## Supplementary Informations

S1: The 403 heterocyclic ILs in the Overall toxicity model.

|    | CAS no.           | Name                                                       |
|----|-------------------|------------------------------------------------------------|
| 1  | 151200-14-5       | 1-Methylimidazolium hydrogen tetrafluoroborate             |
| 2  | 615538-92-6       | 1-Methylimidazolium 2-hydroxypropanoate                    |
| 3  | 1010075-76-9      | 1-Methylimidazolium (2S)-2-hydroxypropanoate               |
| 4  | 615539-01-0       | 1-Decylimidazolium 2-hydroxypropanoate                     |
| 5  | 898223-27-3       | 1-Decylimidazolium (2S)-2-hydroxypropanoate                |
| 6  | 615539-02-1       | 1-Undecylimidazolium 2-hydroxypropanoate                   |
| 7  | 885224-27-1       | 1-Undecylimidazolium (2S)-2-hydroxypropanoate              |
| 8  | 615539-03-2       | 1-Dodecylimidazolium 2-hydroxypropanoate                   |
| 9  | 898558-89-9       | 1-Dodecylimidazolium (2S)-2-hydroxypropanoate              |
| 10 | 615539-10-1       | 1-[(Decyloxy)methyl]imidazolium 2-hydroxypropanoate        |
| 11 | 885224-30-6       | 1-[(Decyloxy)methyl]imidazolium (2S)-2-hydroxypropanoate   |
| 12 | 615539-11-2       | 1-[(Undecyloxy)methyl]imidazolium 2-hydroxypropanoate      |
| 13 | none (2013-09-19) | 1-[(Undecyloxy)methyl]imidazolium (2S)-2-hydroxypropanoate |
| 14 | 615539-12-3       | 1-[(Dodecyloxy)methyl]imidazolium 2-hydroxypropanoate      |
| 15 | 898558-92-4       | 1-[(Dodecyloxy)methyl]imidazolium (2S)-2-hydroxypropanoate |
| 16 | 615539-04-3       | 1-(Butoxymethyl)imidazolium 2-hydroxypropanoate            |
| 17 | 885224-28-2       | 1-(Butoxymethyl)imidazolium (2S)-2-hydroxypropanoate       |
| 18 | 615539-05-4       | 1-[(Pentyloxy)methyl]imidazolium 2-hydroxypropanoate       |
| 19 | none (2013-09-19) | 1-[(Pentyloxy)methyl]imidazolium (2S)-2-hydroxypropanoate  |
| 20 | 615539-06-5       | 1-[(Hexyloxy)methyl]imidazolium 2-hydroxypropanoate        |
| 21 | 885224-29-3       | 1-[(Hexyloxy)methyl]imidazolium (2S)-2-hydroxypropanoate   |
| 22 | 615539-07-6       | 1-[(Heptyloxy)methyl]imidazolium 2-hydroxypropanoate       |
| 23 | none (2013-09-19) | 1-[(Heptyloxy)methyl]imidazolium (2S)-2-hydroxypropanoate  |
| 24 | 615539-08-7       | 1-[(Octyloxy)methyl]imidazolium 2-hydroxypropanoate        |
| 25 | 898558-90-2       | 1-[(Octyloxy)methyl]imidazolium (2S)-2-hydroxypropanoate   |
| 26 | 615539-09-8       | 1-[(Nonyloxy)methyl]imidazolium 2-hydroxypropanoate        |
| 27 | 898558-91-3       | 1-[(Nonyloxy)methyl]imidazolium (2S)-2-hydroxypropanoate   |
| 28 | 615538-93-7       | 1-Ethylimidazolium 2-hydroxypropanoate                     |
| 29 | none (2013-09-19) | 1-Ethylimidazolium (2S)-2-hydroxypropanoate                |
| 30 | 615538-94-8       | 1-Propylimidazolium 2-hydroxypropanoate                    |
| 31 | none (2013-09-19) | 1-Propylimidazolium (2S)-2-hydroxypropanoate               |
| 32 | 885224-25-9       | 1-Butylimidazolium (2S)-2-hydroxypropanoate                |
| 33 | 615538-96-0       | 1-Pentylimidazolium 2-hydroxypropanoate                    |

|    |                   |                                                                                                              |
|----|-------------------|--------------------------------------------------------------------------------------------------------------|
| 34 | none (2013-09-19) | 1-Pentylimidazolium (2S)-2-hydroxypropanoate                                                                 |
| 35 | 615538-97-1       | 1-Hexylimidazolium 2-hydroxypropanoate                                                                       |
| 36 | 885224-26-0       | 1-Hexylimidazolium (2S)-2-hydroxypropanoate                                                                  |
| 37 | 615538-98-2       | 1-Heptylimidazolium 2-hydroxypropanoate                                                                      |
| 38 | none (2013-09-19) | 1-Heptylimidazolium (2S)-2-hydroxypropanoate                                                                 |
| 39 | 615538-99-3       | 1-Octylimidazolium 2-hydroxypropanoate                                                                       |
| 40 | 898558-87-7       | 1-Octylimidazolium (2S)-2-hydroxypropanoate                                                                  |
| 41 | 615539-00-9       | 1-Nonylimidazolium 2-hydroxypropanoate                                                                       |
| 42 | 898558-88-8       | 1-Nonylimidazolium (2S)-2-hydroxypropanoate                                                                  |
| 43 | 847335-66-4       | 1-Methyl-3-(phenylmethyl)imidazolium tetrafluoroborate                                                       |
| 44 | 637348-60-8       | 1-Methyl-3-[(4-methylphenyl)methyl]imidazolium chloride                                                      |
| 45 | 952429-66-2       | 1-Methyl-3-[(4-methylphenyl)methyl]imidazolium hexafluorophosphate                                           |
| 46 | 1310460-36-6      | 1,3-Didecyl-2-methylimidazolium 1,1,1-trifluoro-N-[(trifluoromethyl)sulfonyl]methanesulfonamide              |
| 47 | 174899-81-1       | 1,3-Dimethylimidazolium 1,1,1-trifluoro-N-[(trifluoromethyl)sulfonyl]methanesulfonamide                      |
| 48 | 1241842-81-8      | 1-[1-(1,3-Benzodioxol-5-yl)-2-methoxy-2-oxoethyl]-3-methylimidazolium chloride                               |
| 49 | 1241842-26-1      | 1-[1-(1,3-Benzodioxol-5-yl)-2-butoxy-2-oxoethyl]-3-methylimidazolium bromide                                 |
| 50 | 244193-56-4       | 1-Decyl-3-methylimidazolium tetrafluoroborate                                                                |
| 51 | 188589-32-4       | 1-Decyl-3-methylimidazolium bromide                                                                          |
| 52 | 171058-18-7       | 1-Decyl-3-methylimidazolium chloride                                                                         |
| 53 | 362043-46-7       | 1-Decyl-3-methylimidazolium hexafluorophosphate                                                              |
| 54 | none (2013-09-19) | 1-(11-Ethoxy-11-oxoundecyl)-3-methylimidazolium bromide                                                      |
| 55 | 171058-21-2       | 1-Methyl-3-tetradecylimidazolium chloride                                                                    |
| 56 | 61546-01-8        | 1-Hexadecyl-3-methylimidazolium chloride                                                                     |
| 57 | 171058-19-8       | 1-Methyl-3-octadecylimidazolium chloride                                                                     |
| 58 | 937720-90-6       | 1-(Cyanomethyl)-3-methylimidazolium 1,1,1-trifluoro-N-[(trifluoromethyl)sulfonyl]methanesulfonamide          |
| 59 | 154312-63-7       | 1-(Cyanomethyl)-3-methylimidazolium chloride                                                                 |
| 60 | 503439-24-5       | 1-[2-(Butylamino)-2-oxoethyl]-3-methylimidazolium bromide                                                    |
| 61 | 503439-25-6       | 1-[2-(Butylmethylamino)-2-oxoethyl]-3-methylimidazolium bromide                                              |
| 62 | 109833-17-2       | 1-(2-Methoxy-2-oxoethyl)-3-methylimidazolium bromide                                                         |
| 63 | 1241842-28-3      | 1-[2-[1-(1,3-Benzodioxol-5-yl)-2-butoxy-2-oxoethoxy]-2-oxoethyl]-3-methylimidazolium bromide                 |
| 64 | 503439-30-3       | 1-(2-Ethoxy-2-oxoethyl)-3-methylimidazolium tetrafluoroborate                                                |
| 65 | 109833-18-3       | 1-(2-Ethoxy-2-oxoethyl)-3-methylimidazolium bromide                                                          |
| 66 | 503439-64-3       | 1-Methyl-3-(2-oxo-2-propoxyethyl)imidazolium 1,1,1-trifluoro-N-[(trifluoromethyl)sulfonyl]methanesulfonamide |
| 67 | 911066-07-4       | 1-Methyl-3-(2-oxo-2-propoxyethyl)imidazolium octylsulfate                                                    |
| 68 | 503439-32-5       | 1-Methyl-3-(2-oxo-2-propoxyethyl)imidazolium tetrafluoroborate                                               |
| 69 | 503439-21-2       | 1-Methyl-3-(2-oxo-2-propoxyethyl)imidazolium bromide                                                         |
| 70 | 1065248-59-0      | 1-Methyl-3-(2-oxo-2-propoxyethyl)imidazolium N-cyanocyanamide                                                |
| 71 | 503439-51-8       | 1-Methyl-3-(2-oxo-2-propoxyethyl)imidazolium hexafluorophosphate                                             |
| 72 | 911066-16-5       | 1,2-Dimethyl-3-(2-oxo-2-propoxyethyl)imidazolium octylsulfate                                                |
| 73 | 911066-10-9       | 1,2-Dimethyl-3-(2-oxo-2-propoxyethyl)imidazolium bromide                                                     |

|     |             |                                                                                                        |
|-----|-------------|--------------------------------------------------------------------------------------------------------|
| 74  | 808184-31-8 | 1-(2-Butoxy-2-oxoethyl)-3-methylimidazolium bromide                                                    |
| 75  | 911066-18-7 | 1-Methyl-3-[2-oxo-2-(pentyloxy)ethyl]imidazolium octylsulfate                                          |
| 76  | 808184-34-1 | 1-Methyl-3-[2-oxo-2-(pentyloxy)ethyl]imidazolium bromide                                               |
| 77  | 911066-21-2 | 1,2-Dimethyl-3-[2-oxo-2-(pentyloxy)ethyl]imidazolium octylsulfate                                      |
| 78  | 911066-13-2 | 1,2-Dimethyl-3-[2-oxo-2-(pentyloxy)ethyl]imidazolium bromide                                           |
| 79  | 503439-22-3 | 1-[2-(Hexyloxy)-2-oxoethyl]-3-methylimidazolium bromide                                                |
| 80  | 503439-23-4 | 1-Methyl-3-[2-(octyloxy)-2-oxoethyl]imidazolium bromide                                                |
| 81  | 945996-13-4 | 1-(Ethoxymethyl)-3-methylimidazolium 1,1,1-trifluoro-N-[(trifluoromethyl)sulfonyl]methanesulfonamide   |
| 82  | 945996-02-1 | 1-(Ethoxymethyl)-3-methylimidazolium chloride                                                          |
| 83  | 500996-04-3 | 1-Methyl-3-(phenylmethyl)imidazolium tetrafluoroborate                                                 |
| 84  | 36443-80-8  | 1-Methyl-3-(phenylmethyl)imidazolium chloride                                                          |
| 85  | 433337-11-2 | 1-Methyl-3-(phenylmethyl)imidazolium hexafluorophosphate                                               |
| 86  | 376650-04-3 | 1-Ethyl-3-methylimidazolium bis[1,2-benzenediolato-O1,O2]borate                                        |
| 87  | 852616-00-3 | 1-Ethyl-3-methylimidazolium bis(pentafluoroethyl)phosphinate                                           |
| 88  | 878005-11-9 | 1-Ethyl-3-methylimidazolium trifluorotris(pentafluoroethyl)phosphate                                   |
| 89  | 174899-82-2 | 1-Ethyl-3-methylimidazolium 1,1,1-trifluoro-N-[(trifluoromethyl)sulfonyl]methanesulfonamide            |
| 90  | 376650-06-5 | 1-Ethyl-3-methylimidazolium bis[ethanedioato-O1,O2]borate                                              |
| 91  | 143314-17-4 | 1-Ethyl-3-methylimidazolium acetate                                                                    |
| 92  | 790663-77-3 | 1-Ethyl-3-methylimidazolium 2-(2-methoxyethoxy)ethyl sulfate                                           |
| 93  | 516474-01-4 | 1-Ethyl-3-methylimidazolium methyl sulfate                                                             |
| 94  | 145022-45-3 | 1-Ethyl-3-methylimidazolium methanesulfonate                                                           |
| 95  | 342573-75-5 | 1-Ethyl-3-methylimidazolium ethyl sulfate                                                              |
| 96  | 328090-25-1 | 1-Ethyl-3-methylimidazolium 4-methylbenzenesulfonate                                                   |
| 97  | 790663-79-5 | 1-Ethyl-3-methylimidazolium octylsulfate                                                               |
| 98  | 742099-80-5 | 1-Ethyl-3-methylimidazolium tetracyanoborate                                                           |
| 99  | 143314-16-3 | 1-Ethyl-3-methylimidazolium tetrafluoroborate                                                          |
| 100 | 666823-18-3 | 1-Ethyl-3-methylimidazolium, salt with methanetricarbonitrile (1:1)                                    |
| 101 | 174899-65-1 | 1-Ethyl-3-methylimidazolium trifluoroacetate                                                           |
| 102 | 145022-44-2 | 1-Ethyl-3-methylimidazolium trifluoromethanesulfonate                                                  |
| 103 | 65039-09-0  | 1-Ethyl-3-methylimidazolium chloride                                                                   |
| 104 | 412009-61-1 | 1-Ethyl-3-methylimidazolium hydrogen sulfate                                                           |
| 105 | 370865-89-7 | 1-Ethyl-3-methylimidazolium N-cyanocyanamide                                                           |
| 106 | 331717-63-6 | 1-Ethyl-3-methylimidazolium thiocyanate                                                                |
| 107 | 65039-10-3  | 1-Methyl-3-(2-propenyl)imidazolium chloride                                                            |
| 108 | 313475-50-2 | 1-Methyl-3-(3,3,4,4,5,5,6,6,7,7,8,8,8-tridecafluorooctyl)imidazolium hexafluorophosphate               |
| 109 | 952429-67-3 | 1-Methyl-3-(3-oxobutyl)imidazolium bromide                                                             |
| 110 | 1739-84-0   | 1,2-Dimethylimidazolium                                                                                |
| 111 | 178631-01-1 | 1-(2-Methoxyethyl)-3-methylimidazolium 1,1,1-trifluoro-N-[(trifluoromethyl)sulfonyl]methanesulfonamide |
| 112 | 474972-46-8 | 1-(2-Methoxyethyl)-3-methylimidazolium chloride                                                        |
| 113 | 778593-17-2 | 1-(2-Ethoxyethyl)-3-methylimidazolium 1,1,1-trifluoro-N-[(trifluoromethyl)sulfonyl]methanesulfonamide  |

|     |                   |                                                                                                         |
|-----|-------------------|---------------------------------------------------------------------------------------------------------|
| 114 | 1012793-99-5      | 1-(2-Ethoxyethyl)-3-methylimidazolium bromide                                                           |
| 115 | 474972-49-1       | 1-[2-(2-Methoxyethoxy)ethyl]-3-methylimidazolium chloride                                               |
| 116 | 174899-86-6       | 1-(2-Hydroxyethyl)-3-methylimidazolium 1,1,1-trifluoro-N-[(trifluoromethyl)sulfonyl]methanesulfonamide  |
| 117 | 374564-83-7       | 1-(2-Hydroxyethyl)-3-methylimidazolium tetrafluoroborate                                                |
| 118 | 1012794-00-1      | 1-(2-Hydroxyethyl)-3-methylimidazolium iodide                                                           |
| 119 | 845835-00-9       | 1-Methyl-3-(2-phenylethyl)imidazolium tetrafluoroborate                                                 |
| 120 | 187332-85-0       | 1-Methyl-3-(2-phenylethyl)imidazolium chloride                                                          |
| 121 | 433337-12-3       | 1-Methyl-3-(2-phenylethyl)imidazolium hexafluorophosphate                                               |
| 122 | 216299-72-8       | 1-Methyl-3-propylimidazolium 1,1,1-trifluoro-N-[(trifluoromethyl)sulfonyl]methanesulfonamide            |
| 123 | 244193-48-4       | 1-Methyl-3-propylimidazolium tetrafluoroborate                                                          |
| 124 | 79917-89-8        | 1-Methyl-3-propylimidazolium chloride                                                                   |
| 125 | 216300-12-8       | 1-Methyl-3-propylimidazolium hexafluorophosphate                                                        |
| 126 | 805228-35-7       | 3-(3-Carboxypropyl)-1-methylimidazolium chloride                                                        |
| 127 | 1015254-36-0      | 1-(3-Methoxypropyl)-3-methylimidazolium 1,1,1-trifluoro-N-[(trifluoromethyl)sulfonyl]methanesulfonamide |
| 128 | 1012794-06-7      | 1-(3-Methoxypropyl)-3-methylimidazolium chloride                                                        |
| 129 | 827027-30-5       | 1-(3-Hydroxypropyl)-3-methylimidazolium 1,1,1-trifluoro-N-[(trifluoromethyl)sulfonyl]methanesulfonamide |
| 130 | 355011-34-6       | 1-(3-Hydroxypropyl)-3-methylimidazolium chloride                                                        |
| 131 | 917762-91-5       | 1-Butyl-3-methylimidazolium trifluorotris(pentafluoroethyl)phosphate                                    |
| 132 | 710336-91-7       | 1-Butyl-3-methylimidazolium 1,1,1-trifluoro-N-(trifluoromethyl)methanaminat                             |
| 133 | 174899-83-3       | 1-Butyl-3-methylimidazolium 1,1,1-trifluoro-N-[(trifluoromethyl)sulfonyl]methanesulfonamide             |
| 134 | 595565-54-1       | 1-Butyl-3-methylimidazolium 2-(2-methoxyethoxy)ethyl sulfate                                            |
| 135 | 401788-98-5       | 1-Butyl-3-methylimidazolium methyl sulfate                                                              |
| 136 | 342789-81-5       | 1-Butyl-3-methylimidazolium methanesulfonate                                                            |
| 137 | 410522-18-8       | 1-Butyl-3-methylimidazolium 4-methylbenzenesulfonate                                                    |
| 138 | 445473-58-5       | 1-Butyl-3-methylimidazolium octylsulfate                                                                |
| 139 | 174501-65-6       | 1-Butyl-3-methylimidazolium tetrafluoroborate                                                           |
| 140 | 85100-77-2        | 1-Butyl-3-methylimidazolium bromide                                                                     |
| 141 | 174899-66-2       | 1-Butyl-3-methylimidazolium trifluoromethanesulfonate                                                   |
| 142 | 79917-90-1        | 1-Butyl-3-methylimidazolium chloride                                                                    |
| 143 | 385384-39-4       | 1-Butyl-3-methylimidazolium (T-4)-tetracarbonylcobaltate                                                |
| 144 | 359845-21-9       | 1-Butyl-3-methylimidazolium tetrachloroferrate                                                          |
| 145 | 262297-13-2       | 1-Butyl-3-methylimidazolium hydrogen sulfate                                                            |
| 146 | 65039-05-6        | 1-Butyl-3-methylimidazolium iodide                                                                      |
| 147 | 448245-52-1       | 1-Butyl-3-methylimidazolium N-cyanocyanamide                                                            |
| 148 | none (2013-09-19) | 1-Butyl-3-methylimidazolium hexafluorophosphate                                                         |
| 149 | 174645-81-9       | 1-Butyl-3-methylimidazolium (OC-6-11)-hexafluoroantimonate                                              |
| 150 | 344790-87-0       | 1-Butyl-3-methylimidazolium thiocyanate                                                                 |
| 151 | 350493-08-2       | 1-Butyl-2,3-dimethylimidazolium 1,1,1-trifluoro-N-[(trifluoromethyl)sulfonyl]methanesulfonamide         |
| 152 | 402846-78-0       | 1-Butyl-2,3-dimethylimidazolium tetrafluoroborate                                                       |
| 153 | 765910-73-4       | 1-Butyl-2,3-dimethylimidazolium trifluoromethanesulfonate                                               |

|     |                   |                                                                                                        |
|-----|-------------------|--------------------------------------------------------------------------------------------------------|
| 154 | 864665-30-5       | 1-(4-Hydroxybutyl)-3-methylimidazolium chloride                                                        |
| 155 | 280779-53-5       | 1-Methyl-3-pentylimidazolium 1,1,1-trifluoro-N-[(trifluoromethyl)sulfonyl]methanesulfonamide           |
| 156 | 244193-49-5       | 1-Methyl-3-pentylimidazolium tetrafluoroborate                                                         |
| 157 | 171058-22-3       | 1-Methyl-3-pentylimidazolium chloride                                                                  |
| 158 | 280779-52-4       | 1-Methyl-3-pentylimidazolium hexafluorophosphate                                                       |
| 159 | 697248-62-7       | 1-Hexyl-3-methylimidazolium, salt with 1,2-benzisothiazol-3(2H)-one 1,1-dioxide (1:1)                  |
| 160 | 713512-19-7       | 1-Hexyl-3-methylimidazolium trifluorotris(pentafluoroethyl)phosphate                                   |
| 161 | 943229-71-8       | 1-Hexyl-3-methylimidazolium trifluorotris(heptafluoropropyl)phosphate                                  |
| 162 | 382150-50-7       | 1-Hexyl-3-methylimidazolium 1,1,1-trifluoro-N-[(trifluoromethyl)sulfonyl]methanesulfonamide            |
| 163 | 1196206-01-5      | 1-Hexyl-3-methylimidazolium tris[(trifluoromethyl)sulfonyl]methide (1:1)                               |
| 164 | 244193-50-8       | 1-Hexyl-3-methylimidazolium tetrafluoroborate                                                          |
| 165 | 85100-78-3        | 1-Hexyl-3-methylimidazolium bromide                                                                    |
| 166 | 171058-17-6       | 1-Hexyl-3-methylimidazolium chloride                                                                   |
| 167 | 304680-35-1       | 1-Hexyl-3-methylimidazolium hexafluorophosphate                                                        |
| 168 | 384347-21-1       | 1-Hexyl-2,3-dimethylimidazolium tetrafluoroborate                                                      |
| 169 | 425382-14-5       | 1-Heptyl-3-methylimidazolium 1,1,1-trifluoro-N-[(trifluoromethyl)sulfonyl]methanesulfonamide           |
| 170 | 244193-51-9       | 1-Heptyl-3-methylimidazolium tetrafluoroborate                                                         |
| 171 | 581101-92-0       | 1-Heptyl-3-methylimidazolium chloride                                                                  |
| 172 | 357915-04-9       | 1-Heptyl-3-methylimidazolium hexafluorophosphate                                                       |
| 173 | 952429-64-0       | 1-(7-Carboxyheptyl)-3-methylimidazolium bromide                                                        |
| 174 | 178631-04-4       | 1-Methyl-3-octylimidazolium 1,1,1-trifluoro-N-[(trifluoromethyl)sulfonyl]methanesulfonamide            |
| 175 | 817575-02-3       | 3-Methyl-1-octylimidazolium octylsulfate                                                               |
| 176 | 244193-52-0       | 1-Methyl-3-octylimidazolium tetrafluoroborate                                                          |
| 177 | 61545-99-1        | 1-Methyl-3-octylimidazolium bromide                                                                    |
| 178 | 403842-84-2       | 1-Methyl-3-octylimidazolium trifluoromethanesulfonate                                                  |
| 179 | 64697-40-1        | 1-Methyl-3-octylimidazolium chloride                                                                   |
| 180 | 304680-36-2       | 1-Methyl-3-octylimidazolium hexafluorophosphate                                                        |
| 181 | 952429-65-1       | 1-(8-Hydroxyoctyl)-3-methylimidazolium bromide                                                         |
| 182 | 244193-55-3       | 1-Methyl-3-nonylimidazolium tetrafluoroborate                                                          |
| 183 | 171058-20-1       | 1-Methyl-3-nonylimidazolium chloride                                                                   |
| 184 | 343952-29-4       | 1-Methyl-3-nonylimidazolium hexafluorophosphate                                                        |
| 185 | none (2013-09-19) | 1-Methyl-3-(2-methylpropyl)imidazolium 1,1,1-trifluoro-N-[(trifluoromethyl)sulfonyl]methanesulfonamide |
| 186 | 761410-66-6       | 1,3-Bis[(decyloxy)methyl]imidazolium chloride                                                          |
| 187 | 761410-67-7       | 1,3-Bis[(undecyloxy)methyl]imidazolium chloride                                                        |
| 188 | 761410-68-8       | 1,3-Bis[(dodecyloxy)methyl]imidazolium chloride                                                        |
| 189 | none (2013-09-19) | 1,3-Bis[(tetradecyloxy)methyl]imidazolium chloride                                                     |
| 190 | none (2013-09-19) | 1,3-Bis[(hexadecyloxy)methyl]imidazolium chloride                                                      |
| 191 | 126049-85-2       | 1,3-Bis(propoxymethyl)imidazolium chloride                                                             |
| 192 | 761410-60-0       | 1,3-Bis(butoxymethyl)imidazolium chloride                                                              |
| 193 | 761410-61-1       | 1,3-Bis[(pentyloxy)methyl]imidazolium chloride                                                         |

|     |                   |                                                                                                          |
|-----|-------------------|----------------------------------------------------------------------------------------------------------|
| 194 | 761410-62-2       | 1,3-Bis[(hexyloxy)methyl]imidazolium chloride                                                            |
| 195 | 761410-63-3       | 1,3-Bis[(heptyloxy)methyl]imidazolium chloride                                                           |
| 196 | 761410-64-4       | 1,3-Bis[(octyloxy)methyl]imidazolium chloride                                                            |
| 197 | 761410-65-5       | 1,3-Bis[(nonyloxy)methyl]imidazolium chloride                                                            |
| 198 | 581101-93-1       | 1-Decyl-3-ethylimidazolium bromide                                                                       |
| 199 | 174899-88-8       | 1,3-Diethylimidazolium 1,1,1-trifluoro-N-[(trifluoromethyl)sulfonyl]methanesulfonamide                   |
| 200 | 54304-66-4        | 1,3-Diethylimidazolium bromide                                                                           |
| 201 | 347882-21-7       | 1-Ethyl-3-propylimidazolium 1,1,1-trifluoro-N-[(trifluoromethyl)sulfonyl]methanesulfonamide              |
| 202 | 637348-59-5       | 1-Ethyl-3-propylimidazolium bromide                                                                      |
| 203 | 581101-91-9       | 1-Butyl-3-ethylimidazolium tetrafluoroborate                                                             |
| 204 | 174899-96-8       | 1-Butyl-3-ethylimidazolium trifluoroacetate                                                              |
| 205 | 145022-48-6       | 1-Butyl-3-ethylimidazolium trifluoromethanesulfonate                                                     |
| 206 | 393550-29-3       | 1-Ethyl-3-hexylimidazolium tetrafluoroborate                                                             |
| 207 | 547719-00-6       | 1-Ethyl-3-hexylimidazolium bromide                                                                       |
| 208 | none (2013-09-19) | 1,3-Dipropylimidazolium 1,1,1-trifluoro-N-[(trifluoromethyl)sulfonyl]methanesulfonamide                  |
| 209 | 749921-07-1       | 1,3-Dibutylimidazolium 1,1,1-trifluoro-N-[(trifluoromethyl)sulfonyl]methanesulfonamide                   |
| 210 | none (2013-09-19) | 1,3-Dipentylimidazolium 1,1,1-trifluoro-N-[(trifluoromethyl)sulfonyl]methanesulfonamide                  |
| 211 | none (2013-09-19) | 1,3-Dihexylimidazolium 1,1,1-trifluoro-N-[(trifluoromethyl)sulfonyl]methanesulfonamide                   |
| 212 | 68039-12-3        | 1H-Imidazolium, 1-ethyl-2-(8-heptadecenyl)-4,5-dihydro-3-(2-hydroxyethyl)-, ethyl sulfate                |
| 213 | 1040381-03-0      | 4-(Cyanomethyl)-4-methylmorpholinium 1,1,1-trifluoro-N-[(trifluoromethyl)sulfonyl]methanesulfonamide     |
| 214 | 1012794-13-6      | 4-(Cyanomethyl)-4-methylmorpholinium chloride                                                            |
| 215 | 1049751-90-7      | 4-(Ethoxymethyl)-4-methylmorpholinium 1,1,1-trifluoro-N-[(trifluoromethyl)sulfonyl]methanesulfonamide    |
| 216 | 1012794-15-8      | 4-(Ethoxymethyl)-4-methylmorpholinium chloride                                                           |
| 217 | 445497-25-6       | 4-Ethyl-4-methylmorpholinium 4-methylbenzenesulfonate                                                    |
| 218 | 796039-07-1       | 4-(2-Methoxyethyl)-4-methylmorpholinium 1,1,1-trifluoro-N-[(trifluoromethyl)sulfonyl]methanesulfonamide  |
| 219 | 1012794-10-3      | 4-(2-Methoxyethyl)-4-methylmorpholinium chloride                                                         |
| 220 | 663628-48-6       | 4-(2-Ethoxyethyl)-4-methylmorpholinium 1,1,1-trifluoro-N-[(trifluoromethyl)sulfonyl]methanesulfonamide   |
| 221 | 1012794-09-0      | 4-(2-Ethoxyethyl)-4-methylmorpholinium bromide                                                           |
| 222 | 868742-24-9       | 4-(2-Hydroxyethyl)-4-methylmorpholinium 1,1,1-trifluoro-N-[(trifluoromethyl)sulfonyl]methanesulfonamide  |
| 223 | 53875-78-8        | 4-(2-Hydroxyethyl)-4-methylmorpholinium iodide                                                           |
| 224 | 1049751-91-8      | 4-(3-Methoxypropyl)-4-methylmorpholinium 1,1,1-trifluoro-N-[(trifluoromethyl)sulfonyl]methanesulfonamide |
| 225 | 1012794-12-5      | 4-(3-Methoxypropyl)-4-methylmorpholinium chloride                                                        |
| 226 | 1026019-24-8      | 4-(3-Hydroxypropyl)-4-methylmorpholinium 1,1,1-trifluoro-N-[(trifluoromethyl)sulfonyl]methanesulfonamide |
| 227 | 1012794-11-4      | 4-(3-Hydroxypropyl)-4-methylmorpholinium chloride                                                        |
| 228 | 324574-95-0       | 4-Butyl-4-methylmorpholinium 1,1,1-trifluoro-N-[(trifluoromethyl)sulfonyl]methanesulfonamide             |
| 229 | 75174-77-5        | 4-Butyl-4-methylmorpholinium bromide                                                                     |
| 230 | 1309983-34-3      | 1-(Cyanomethyl)-1-methylpiperidinium 1,1,1-trifluoro-N-[(trifluoromethyl)sulfonyl]methanesulfonamide     |
| 231 | 194986-67-9       | 1-(Cyanomethyl)-1-methylpiperidinium chloride                                                            |
| 232 | 1049751-93-0      | 1-(Ethoxymethyl)-1-methylpiperidinium 1,1,1-trifluoro-N-[(trifluoromethyl)sulfonyl]methanesulfonamide    |
| 233 | 1012794-08-9      | 1-(Ethoxymethyl)-1-methylpiperidinium chloride                                                           |

|     |                   |                                                                                                          |
|-----|-------------------|----------------------------------------------------------------------------------------------------------|
| 234 | 873583-83-6       | 1-(2-Methoxyethyl)-1-methylpiperidinium 1,1,1-trifluoro-N-[(trifluoromethyl)sulfonyl]methanesulfonamide  |
| 235 | 886439-37-8       | 1-(2-Methoxyethyl)-1-methylpiperidinium bromide                                                          |
| 236 | 663628-45-3       | 1-(2-Ethoxyethyl)-1-methylpiperidinium 1,1,1-trifluoro-N-[(trifluoromethyl)sulfonyl]methanesulfonamide   |
| 237 | 663628-44-2       | 1-(2-Ethoxyethyl)-1-methylpiperidinium bromide                                                           |
| 238 | 757212-03-6       | 1-(2-Hydroxyethyl)-1-methylpiperidinium 1,1,1-trifluoro-N-[(trifluoromethyl)sulfonyl]methanesulfonamide  |
| 239 | 67889-35-4        | 1-(2-Hydroxyethyl)-1-methylpiperidinium iodide                                                           |
| 240 | 608140-12-1       | 1-Methyl-1-propylpiperidinium 1,1,1-trifluoro-N-[(trifluoromethyl)sulfonyl]methanesulfonamide            |
| 241 | none (2013-09-19) | 1-Methyl-1-propylpiperidinium hexafluorophosphate                                                        |
| 242 | 1049751-95-2      | 1-(3-Methoxypropyl)-1-methylpiperidinium 1,1,1-trifluoro-N-[(trifluoromethyl)sulfonyl]methanesulfonamide |
| 243 | 1012794-04-5      | 1-(3-Methoxypropyl)-1-methylpiperidinium chloride                                                        |
| 244 | 1049751-96-3      | 1-(3-Hydroxypropyl)-1-methylpiperidinium 1,1,1-trifluoro-N-[(trifluoromethyl)sulfonyl]methanesulfonamide |
| 245 | 1334291-67-6      | 1-(3-Hydroxypropyl)-1-methylpiperidinium chloride                                                        |
| 246 | 623580-02-9       | 1-Butyl-1-methylpiperidinium 1,1,1-trifluoro-N-[(trifluoromethyl)sulfonyl]methanesulfonamide             |
| 247 | 94280-72-5        | 1-Butyl-1-methylpiperidinium bromide                                                                     |
| 248 | 628-13-7          | Pyridine hydrochloride                                                                                   |
| 249 | 1241842-94-3      | 1-[1-(1,3-Benzodioxol-5-yl)-2-methoxy-2-oxoethyl]pyridinium bromide                                      |
| 250 | 1241840-01-6      | 1-[1-(3,4-Dimethoxyphenyl)-2-methoxy-2-oxoethyl]pyridinium chloride                                      |
| 251 | 1424967-13-4      | 1-[1-(1,3-Benzodioxol-5-yl)-2-butoxy-2-oxoethyl]pyridinium bromide                                       |
| 252 | 7538-79-6         | 4-(Dimethylamino)-1-methylpyridinium iodide                                                              |
| 253 | 1017553-46-6      | 1-(Cyanomethyl)pyridinium 1,1,1-trifluoro-N-[(trifluoromethyl)sulfonyl]methanesulfonamide                |
| 254 | 17281-59-3        | 1-(Cyanomethyl)pyridinium chloride                                                                       |
| 255 | 1241839-96-2      | 1-[2-[1-(1,3-Benzodioxol-5-yl)-2-methoxy-2-oxoethoxy]-2-oxoethyl]pyridinium bromide                      |
| 256 | 1241842-60-3      | 1-[2-[1-(1,3-Benzodioxol-5-yl)-2-butoxy-2-oxoethoxy]-2-oxoethyl]pyridinium bromide                       |
| 257 | 435346-40-0       | 3-(Aminocarbonyl)-1-[(cyclododecyloxy)methyl]pyridinium chloride                                         |
| 258 | 435346-66-0       | 3-[[[(Decyloxy)methoxy]methyl]amino]carbonyl]-1-[(decyloxy)methyl]pyridinium chloride                    |
| 259 | 435346-34-2       | 3-(Aminocarbonyl)-1-[(decyloxy)methyl]pyridinium chloride                                                |
| 260 | 435346-58-0       | 3-(Aminocarbonyl)-1-[(decyloxy)methyl]pyridinium (T-4)-tetrachloroferrate                                |
| 261 | 435346-54-6       | Bis[3-(aminocarbonyl)-1-[(decyloxy)methyl]pyridinium] (T-4)-tetrachlorocobaltate                         |
| 262 | 435346-55-7       | Bis[3-(aminocarbonyl)-1-[(decyloxy)methyl]pyridinium] (T-4)-tetrachlorocuprate                           |
| 263 | 435346-57-9       | Bis[3-(aminocarbonyl)-1-[(decyloxy)methyl]pyridinium] (T-4)-tetrachloromagnesate                         |
| 264 | 435346-56-8       | Bis[3-(aminocarbonyl)-1-[(decyloxy)methyl]pyridinium] (T-4)-tetrachlorozincate                           |
| 265 | 435346-76-2       | 4-(Aminocarbonyl)-1-[(decyloxy)methyl]pyridinium chloride                                                |
| 266 | 435346-35-3       | 3-(Aminocarbonyl)-1-[(undecyloxy)methyl]pyridinium chloride                                              |
| 267 | 1127350-84-8      | 3-Hydroxy-1-[(undecyloxy)methyl]pyridinium, salt with 1,2-benzisothiazol-3(2H)-one 1,1-dioxide (1:1)     |
| 268 | 1127350-78-0      | 3-Hydroxy-1-[(undecyloxy)methyl]pyridinium 6-methyl-2,2-dioxo-1,2,3-oxathiazin-4(3H)-onate (1:1)         |
| 269 | 454234-78-7       | 3-Hydroxy-1-[(undecyloxy)methyl]pyridinium chloride                                                      |
| 270 | 435346-77-3       | 4-(Aminocarbonyl)-1-[(undecyloxy)methyl]pyridinium chloride                                              |
| 271 | 435346-53-5       | 3-(Aminocarbonyl)-1-[(dodecyloxy)methyl]pyridinium acetate                                               |
| 272 | 435346-52-4       | 3-(Aminocarbonyl)-1-[(dodecyloxy)methyl]pyridinium tetrafluoroborate                                     |
| 273 | 435346-41-1       | 3-(Aminocarbonyl)-1-[(dodecyloxy)methyl]pyridinium bromide                                               |

|     |              |                                                                                                        |
|-----|--------------|--------------------------------------------------------------------------------------------------------|
| 274 | 435346-36-4  | 3-(Aminocarbonyl)-1-[(dodecyloxy)methyl]pyridinium chloride                                            |
| 275 | 435346-45-5  | 3-(Aminocarbonyl)-1-[(dodecyloxy)methyl]pyridinium perchlorate                                         |
| 276 | 435346-42-2  | 3-(Aminocarbonyl)-1-[(dodecyloxy)methyl]pyridinium iodide                                              |
| 277 | 435346-44-4  | 3-(Aminocarbonyl)-1-[(dodecyloxy)methyl]pyridinium nitrate                                             |
| 278 | 435346-78-4  | 4-(Aminocarbonyl)-1-[(dodecyloxy)methyl]pyridinium chloride                                            |
| 279 | 1277184-36-7 | 3-Hydroxy-1-[(octadecyloxy)methyl]pyridinium, salt with 1,2-benzisothiazol-3(2H)-one 1,1-dioxide (1:1) |
| 280 | 1277184-26-5 | 3-Hydroxy-1-[(octadecyloxy)methyl]pyridinium 6-methyl-2,2-dioxo-1,2,3-oxathiazin-4(3H)-onate (1:1)     |
| 281 | 1049751-98-5 | 1-(Ethoxymethyl)pyridinium 1,1,1-trifluoro-N-[(trifluoromethyl)sulfonyl]methanesulfonamide             |
| 282 | 21379-36-2   | 1-(Ethoxymethyl)pyridinium chloride                                                                    |
| 283 | 1127350-79-1 | 3-Hydroxy-1-(propoxymethyl)pyridinium, salt with 1,2-benzisothiazol-3(2H)-one 1,1-dioxide (1:1)        |
| 284 | 1127350-73-5 | 3-Hydroxy-1-(propoxymethyl)pyridinium 6-methyl-2,2-dioxo-1,2,3-oxathiazin-4(3H)-onate (1:1)            |
| 285 | 454234-70-9  | 3-Hydroxy-1-(propoxymethyl)pyridinium chloride                                                         |
| 286 | 1127350-80-4 | 1-(Butoxymethyl)-3-hydroxypyridinium, salt with 1,2-benzisothiazol-3(2H)-one 1,1-dioxide (1:1)         |
| 287 | 1127350-74-6 | 1-(Butoxymethyl)-3-hydroxypyridinium 6-methyl-2,2-dioxo-1,2,3-oxathiazin-4(3H)-onate (1:1)             |
| 288 | 1127350-82-6 | 1-[(Hexyloxy)methyl]-3-hydroxypyridinium, salt with 1,2-benzisothiazol-3(2H)-one 1,1-dioxide (1:1)     |
| 289 | 1127350-76-8 | 1-[(Hexyloxy)methyl]-3-hydroxypyridinium 6-methyl-2,2-dioxo-1,2,3-oxathiazin-4(3H)-onate (1:1)         |
| 290 | 435346-63-7  | 3-[[[(Heptyloxy)methoxy]methyl]amino]carbonyl]-1-[(heptyloxy)methyl]pyridinium chloride                |
| 291 | 1127350-83-7 | 1-[(Heptyloxy)methyl]-3-hydroxypyridinium, salt with 1,2-benzisothiazol-3(2H)-one 1,1-dioxide (1:1)    |
| 292 | 1127350-77-9 | 1-[(Heptyloxy)methyl]-3-hydroxypyridinium 6-methyl-2,2-dioxo-1,2,3-oxathiazin-4(3H)-onate (1:1)        |
| 293 | 454234-74-3  | 1-[(Heptyloxy)methyl]-3-hydroxypyridinium chloride                                                     |
| 294 | 435346-64-8  | 3-[[[(Octyloxy)methoxy]methyl]amino]carbonyl]-1-[(octyloxy)methyl]pyridinium chloride                  |
| 295 | 435346-65-9  | 3-[[[(Nonyloxy)methoxy]methyl]amino]carbonyl]-1-[(nonyloxy)methyl]pyridinium chloride                  |
| 296 | 2294-38-4    | 1-Ethylpyridinium chloride                                                                             |
| 297 | 900797-77-5  | 4-(Dimethylamino)-1-ethylpyridinium 1,1,1-trifluoro-N-[(trifluoromethyl)sulfonyl]methanesulfonamide    |
| 298 | 114203-57-5  | 4-(Dimethylamino)-1-ethylpyridinium bromide                                                            |
| 299 | 863663-01-8  | 1-(2-Methoxyethyl)pyridinium 1,1,1-trifluoro-N-[(trifluoromethyl)sulfonyl]methanesulfonamide           |
| 300 | 209679-88-9  | 1-(2-Methoxyethyl)pyridinium chloride                                                                  |
| 301 | 849418-12-8  | 1-(2-Ethoxyethyl)pyridinium 1,1,1-trifluoro-N-[(trifluoromethyl)sulfonyl]methanesulfonamide            |
| 302 | 108153-25-9  | 1-(2-Ethoxyethyl)pyridinium bromide                                                                    |
| 303 | 752260-02-9  | 1-(2-Hydroxyethyl)pyridinium 1,1,1-trifluoro-N-[(trifluoromethyl)sulfonyl]methanesulfonamide           |
| 304 | 69095-13-2   | 1-(2-Hydroxyethyl)pyridinium iodide                                                                    |
| 305 | 1104525-90-7 | 1-Propylpyridinium 1,1,1-trifluoro-N-[(trifluoromethyl)sulfonyl]methanesulfonamide                     |
| 306 | 873-71-2     | 1-Propylpyridinium bromide                                                                             |
| 307 | 1049752-00-2 | 1-(3-Methoxypropyl)pyridinium 1,1,1-trifluoro-N-[(trifluoromethyl)sulfonyl]methanesulfonamide          |
| 308 | 1012794-07-8 | 1-(3-Methoxypropyl)pyridinium chloride                                                                 |
| 309 | 827027-29-2  | 1-(3-Hydroxypropyl)pyridinium 1,1,1-trifluoro-N-[(trifluoromethyl)sulfonyl]methanesulfonamide          |
| 310 | 187863-16-7  | 1-(3-Hydroxypropyl)pyridinium chloride                                                                 |
| 311 | 941580-56-9  | 1-(3-Sulfopropyl)pyridinium trifluoromethanesulfonate                                                  |
| 312 | 885456-20-2  | 1-Butylpyridinium methyl sulfate                                                                       |
| 313 | 67226-45-3   | 1-Butylpyridinium $\mu$ -chlorohexachlorodialuminate                                                   |



|     |              |                                                                                                     |
|-----|--------------|-----------------------------------------------------------------------------------------------------|
| 314 | 203389-28-0  | 1-Butylpyridinium tetrafluoroborate                                                                 |
| 315 | 874-80-6     | 1-Butylpyridinium bromide                                                                           |
| 316 | 390423-43-5  | 1-Butylpyridinium trifluoromethanesulfonate                                                         |
| 317 | 1124-64-7    | 1-Butylpyridinium chloride                                                                          |
| 318 | 827033-71-6  | 1-Butylpyridinium N-cyanocyanamide                                                                  |
| 319 | 186088-50-6  | 1-Butylpyridinium hexafluorophosphate                                                               |
| 320 | 286453-46-1  | 1-Butyl-2-methylpyridinium tetrafluoroborate                                                        |
| 321 | 112400-85-8  | 1-Butyl-2-methylpyridinium chloride                                                                 |
| 322 | 597581-48-1  | 1-Butyl-3-methylpyridinium tetrafluoroborate                                                        |
| 323 | 26576-85-2   | 1-Butyl-3-methylpyridinium bromide                                                                  |
| 324 | 125652-55-3  | 1-Butyl-3-methylpyridinium chloride                                                                 |
| 325 | 712355-12-9  | 1-Butyl-3-methylpyridinium N-cyanocyanamide                                                         |
| 326 | 845835-03-2  | 1-Butyl-3-methylpyridinium hexafluorophosphate                                                      |
| 327 | 952429-71-9  | 1-Butyl-3,4-dimethylpyridinium tetrafluoroborate                                                    |
| 328 | 916730-30-8  | 1-Butyl-3,4-dimethylpyridinium chloride                                                             |
| 329 | 952429-72-0  | 1-Butyl-3,5-dimethylpyridinium tetrafluoroborate                                                    |
| 330 | 26576-98-7   | 1-Butyl-3,5-dimethylpyridinium bromide                                                              |
| 331 | 916730-31-9  | 1-Butyl-3,5-dimethylpyridinium chloride                                                             |
| 332 | 877678-54-1  | 1-Butyl-3,5-dimethylpyridinium N-cyanocyanamide                                                     |
| 333 | 883860-38-6  | 1-Butyl-4-methylpyridinium trifluorotris(pentafluoroethyl)phosphate                                 |
| 334 | 742099-83-8  | 1-Butyl-4-methylpyridinium tetracyanoborate                                                         |
| 335 | 343952-33-0  | 1-Butyl-4-methylpyridinium tetrafluoroborate                                                        |
| 336 | 112400-86-9  | 1-Butyl-4-methylpyridinium chloride                                                                 |
| 337 | 401788-99-6  | 1-Butyl-4-methylpyridinium hexafluorophosphate                                                      |
| 338 | 900797-79-7  | 1-Butyl-4-(dimethylamino)pyridinium 1,1,1-trifluoro-N-[(trifluoromethyl)sulfonyl]methanesulfonamide |
| 339 | 82522-15-4   | 1-Butyl-4-(dimethylamino)pyridinium chloride                                                        |
| 340 | 890532-45-3  | 1-Pentylpyridinium 1,1,1-trifluoro-N-[(trifluoromethyl)sulfonyl]methanesulfonamide                  |
| 341 | 53385-72-1   | 1-Pentylpyridinium bromide                                                                          |
| 342 | 460983-97-5  | 1-Hexylpyridinium 1,1,1-trifluoro-N-[(trifluoromethyl)sulfonyl]methanesulfonamide                   |
| 343 | 623167-81-7  | 1-Hexylpyridinium trifluoromethanesulfonate                                                         |
| 344 | 6220-15-1    | 1-Hexylpyridinium chloride                                                                          |
| 345 | 797789-00-5  | 1-Hexylpyridinium hexafluorophosphate                                                               |
| 346 | 67021-56-1   | 1-Hexyl-3-methylpyridinium bromide                                                                  |
| 347 | 916730-40-0  | 1-Hexyl-3-methylpyridinium chloride                                                                 |
| 348 | 952429-73-1  | 1-Hexyl-4-methylpyridinium tetrafluoroborate                                                        |
| 349 | 62409-49-8   | 1-Hexyl-4-methylpyridinium chloride                                                                 |
| 350 | 872672-57-6  | 4-(Dimethylamino)-1-hexylpyridinium 1,1,1-trifluoro-N-[(trifluoromethyl)sulfonyl]methanesulfonamide |
| 351 | 1012794-14-7 | 4-(Dimethylamino)-1-hexylpyridinium chloride                                                        |
| 352 | 384347-06-2  | 1-Octylpyridinium 1,1,1-trifluoro-N-[(trifluoromethyl)sulfonyl]methanesulfonamide                   |
| 353 | 4086-73-1    | 1-Octylpyridinium chloride                                                                          |

|     |              |                                                                                                               |
|-----|--------------|---------------------------------------------------------------------------------------------------------------|
| 354 | 872672-72-5  | 3-Methyl-1-octylpyridinium bromide                                                                            |
| 355 | 864461-36-9  | 3-Methyl-1-octylpyridinium chloride                                                                           |
| 356 | 936239-96-2  | 4-Methyl-1-octylpyridinium tetrafluoroborate                                                                  |
| 357 | 141645-91-2  | 4-Methyl-1-octylpyridinium chloride                                                                           |
| 358 | 1017553-47-7 | 1-(Cyanomethyl)-1-methylpyrrolidinium 1,1,1-trifluoro-N-[(trifluoromethyl)sulfonyl]methanesulfonamide         |
| 359 | 194986-69-1  | 1-(Cyanomethyl)-1-methylpyrrolidinium chloride                                                                |
| 360 | 1187194-44-0 | 1-(2-Ethoxy-2-oxoethyl)-1-methylpyrrolidinium tris(pentafluoroethyl)trifluorophosphate                        |
| 361 | 1107545-20-9 | 1-(2-Ethoxy-2-oxoethyl)-1-methylpyrrolidinium 1,1,1-trifluoro-N-[(trifluoromethyl)sulfonyl]methanesulfonamide |
| 362 | 129412-64-2  | 1-(2-Ethoxy-2-oxoethyl)-1-methylpyrrolidinium bromide                                                         |
| 363 | 1373334-02-1 | 1-(Ethoxymethyl)-1-methylpyrrolidinium 1,1,1-trifluoro-N-[(trifluoromethyl)sulfonyl]methanesulfonamide        |
| 364 | 151263-00-2  | 1-(Ethoxymethyl)-1-methylpyrrolidinium chloride                                                               |
| 365 | 1195983-48-2 | 1-(2-Methoxyethyl)-1-methylpyrrolidinium tris(pentafluoroethyl)trifluorophosphate                             |
| 366 | 757240-24-7  | 1-(2-Methoxyethyl)-1-methylpyrrolidinium 1,1,1-trifluoro-N-[(trifluoromethyl)sulfonyl]methanesulfonamide      |
| 367 | 1012794-01-2 | 1-(2-Methoxyethyl)-1-methylpyrrolidinium chloride                                                             |
| 368 | 663628-46-4  | 1-(2-Ethoxyethyl)-1-methylpyrrolidinium 1,1,1-trifluoro-N-[(trifluoromethyl)sulfonyl]methanesulfonamide       |
| 369 | 833446-39-2  | 1-(2-Ethoxyethyl)-1-methylpyrrolidinium bromide                                                               |
| 370 | 757212-04-7  | 1-(2-Hydroxyethyl)-1-methylpyrrolidinium 1,1,1-trifluoro-N-[(trifluoromethyl)sulfonyl]methanesulfonamide      |
| 371 | 54770-67-1   | 1-(2-Hydroxyethyl)-1-methylpyrrolidinium iodide                                                               |
| 372 | 327022-58-2  | 1-Methyl-1-propylpyrrolidinium hexafluorophosphate                                                            |
| 373 | 1373334-04-3 | 1-(3-Methoxypropyl)-1-methylpyrrolidinium 1,1,1-trifluoro-N-[(trifluoromethyl)sulfonyl]methanesulfonamide     |
| 374 | 1012794-05-6 | 1-(3-Methoxypropyl)-1-methylpyrrolidinium chloride                                                            |
| 375 | 1332694-08-2 | 1-(3-Hydroxypropyl)-1-methylpyrrolidinium 1,1,1-trifluoro-N-[(trifluoromethyl)sulfonyl]methanesulfonamide     |
| 376 | 941584-15-2  | 1-(3-Hydroxypropyl)-1-methylpyrrolidinium chloride                                                            |
| 377 | 851856-47-8  | 1-Butyl-1-methylpyrrolidinium trifluorotris(pentafluoroethyl)phosphate                                        |
| 378 | 223437-11-4  | 1-Butyl-1-methylpyrrolidinium 1,1,1-trifluoro-N-[(trifluoromethyl)sulfonyl]methanesulfonamide                 |
| 379 | 345984-11-4  | 1-Butyl-1-methylpyrrolidinium tetrafluoroborate                                                               |
| 380 | 93457-69-3   | 1-Butyl-1-methylpyrrolidinium bromide                                                                         |
| 381 | 479500-35-1  | 1-Butyl-1-methylpyrrolidinium chloride                                                                        |
| 382 | 370865-80-8  | 1-Butyl-1-methylpyrrolidinium N-cyanocyanamide                                                                |
| 383 | 380497-19-8  | 1-Hexyl-1-methylpyrrolidinium 1,1,1-trifluoro-N-[(trifluoromethyl)sulfonyl]methanesulfonamide                 |
| 384 | 909398-59-0  | 1-Hexyl-1-methylpyrrolidinium chloride                                                                        |
| 385 | 952429-74-2  | 1-Methyl-1-octylpyrrolidinium tetrafluoroborate                                                               |
| 386 | 909398-60-3  | 1-Methyl-1-octylpyrrolidinium chloride                                                                        |
| 387 | 13501-50-3   | 1-[(Decyloxy)methyl]quinolinium chloride                                                                      |
| 388 | 97166-43-3   | 1-[(Decyloxy)methyl]-6-methylquinolinium chloride                                                             |
| 389 | 97166-47-7   | 1-[(Decyloxy)methyl]-8-hydroxyquinolinium chloride                                                            |
| 390 | 41063-22-3   | 1-[(Dodecyloxy)methyl]quinolinium chloride                                                                    |
| 391 | 97166-44-4   | 1-[(Dodecyloxy)methyl]-6-methylquinolinium chloride                                                           |
| 392 | 97166-48-8   | 1-[(Dodecyloxy)methyl]-8-hydroxyquinolinium chloride                                                          |
| 393 | 97166-39-7   | 1-[(Hexyloxy)methyl]quinolinium chloride                                                                      |

|            |             |                                                    |
|------------|-------------|----------------------------------------------------|
| <b>394</b> | 97166-41-1  | 1-[(Hexyloxy)methyl]-6-methylquinolinium chloride  |
| <b>395</b> | 97166-45-5  | 1-[(Hexyloxy)methyl]-8-hydroxyquinolinium chloride |
| <b>396</b> | 97166-40-0  | 1-[(Octyloxy)methyl]quinolinium chloride           |
| <b>397</b> | 97166-42-2  | 6-Methyl-1-[(octyloxy)methyl]quinolinium chloride  |
| <b>398</b> | 97166-46-6  | 8-Hydroxy-1-[(octyloxy)methyl]quinolinium chloride |
| <b>399</b> | 952429-68-4 | 1-Butylquinolinium tetrafluoroborate               |
| <b>400</b> | 31537-79-8  | 1-Butylquinolinium bromide                         |
| <b>401</b> | 952429-69-5 | 1-Hexylquinolinium tetrafluoroborate               |
| <b>402</b> | 952429-70-8 | 1-Octylquinolinium tetrafluoroborate               |
| <b>403</b> | 14848-21-6  | 1-Octylquinolinium bromide                         |

---

S2: The 35 variables in the Overall toxicity model.

|    | Variables                                                            | unit      |
|----|----------------------------------------------------------------------|-----------|
| 1  | <i>Candida albicans</i> ATCC 10231 (growth inhibition) 48h           | log(MIC)  |
| 2  | <i>Candida albicans</i> ATCC 10231 (death) 5d                        | log(MBC)  |
| 3  | <i>Enterococcus hirae</i> ATCC 10541 (growth inhibition) 24h         | log(MIC)  |
| 4  | <i>Enterococcus hirae</i> ATCC 10541 (death) 48h                     | log(MBC)  |
| 5  | <i>Escherichia coli</i> ATCC 25922 (growth inhibition) 24h           | log(MIC)  |
| 6  | <i>Escherichia coli</i> ATCC 25922 (death) 48h                       | log(MBC)  |
| 7  | <i>Klebsiella pneumoniae</i> ATCC 4352 (growth inhibition) 24h       | log(MIC)  |
| 8  | <i>Klebsiella pneumoniae</i> ATCC 4352 (death) 48h                   | log(MBC)  |
| 9  | <i>Lemna minor</i> (frond area) 7d                                   | log(EC50) |
| 10 | <i>Lemna minor</i> (frond number) 7d                                 | log(EC50) |
| 11 | <i>Micrococcus luteus</i> ATCC 9341 (growth inhibition) 24h          | log(MIC)  |
| 12 | <i>Micrococcus luteus</i> ATCC 9341 (death) 48h                      | log(MBC)  |
| 13 | <i>Proteus vulgaris</i> NCTC 4635 (growth inhibition) 24h            | log(MIC)  |
| 14 | <i>Proteus vulgaris</i> NCTC 4635 (death) 48h                        | log(MBC)  |
| 15 | <i>Pseudomonas aeruginosa</i> ATCC 27853 (growth inhibition) 24h     | log(MIC)  |
| 16 | <i>Pseudomonas aeruginosa</i> ATCC 27853 (death) 48h                 | log(MBC)  |
| 17 | <i>Pseudomonas aeruginosa</i> NCTC 6749 (growth inhibition) 24h      | log(MIC)  |
| 18 | <i>Rhodotorula rubra</i> PhB (growth inhibition) 48h                 | log(MIC)  |
| 19 | <i>Rhodotorula rubra</i> PhB (death) 5d                              | log(MBC)  |
| 20 | <i>Scenedesmus vacuolatus</i> (cell count) 24h                       | log(EC50) |
| 21 | <i>Serratia marcescens</i> ATCC 8100 (growth inhibition) 24h         | log(MIC)  |
| 22 | <i>Serratia marcescens</i> ATCC 8100 (death) 48h                     | log(MBC)  |
| 23 | <i>Staphylococcus aureus</i> ATCC 6538 (growth inhibition) 24h       | log(MIC)  |
| 24 | <i>Staphylococcus aureus</i> ATCC 6538 (death) 48h                   | log(MBC)  |
| 25 | <i>Staphylococcus aureus</i> (MRSA) (growth inhibition) 24h          | log(MIC)  |
| 26 | <i>Staphylococcus aureus</i> (MRSA) (death) 48h                      | log(MBC)  |
| 27 | <i>Staphylococcus aureus</i> NCTC 4163 (growth inhibition) 24h       | log(MIC)  |
| 28 | <i>Staphylococcus epidermidis</i> ATCC 12228 (growth inhibition) 24h | log(MIC)  |
| 29 | <i>Staphylococcus epidermidis</i> ATCC 12228 (death) 48h             | log(MBC)  |
| 30 | <i>Vibrio fischeri</i> 5'                                            | log(EC50) |
| 31 | <i>Vibrio fischeri</i> 15'                                           | log(EC50) |
| 32 | <i>Vibrio fischeri</i> 30'                                           | log(EC50) |
| 33 | Acetylcholinesterase inhibition                                      | log(EC50) |
| 34 | IPC-81 leukemia cells cytotoxicity                                   | log(EC50) |
| 35 | BOD 28 d                                                             | %         |

S3: The 104 ILs in the Aquatic toxicity model.

| CAS no. | Name                                                                                                                 |
|---------|----------------------------------------------------------------------------------------------------------------------|
| 1       | 174899-81-1 1,3-Dimethylimidazolium 1,1,1-trifluoro-N-[(trifluoromethyl)sulfonyl]methanesulfonamide                  |
| 2       | 1241842-81-8 1-[1-(1,3-Benzodioxol-5-yl)-2-methoxy-2-oxoethyl]-3-methylimidazolium chloride                          |
| 3       | 1241842-26-1 1-[1-(1,3-Benzodioxol-5-yl)-2-butoxy-2-oxoethyl]-3-methylimidazolium bromide                            |
| 4       | 244193-56-4 1-Decyl-3-methylimidazolium tetrafluoroborate                                                            |
| 5       | none (2013-09-19) 1-(11-Ethoxy-11-oxoundecyl)-3-methylimidazolium bromide                                            |
| 6       | 171058-21-2 1-Methyl-3-tetradecylimidazolium chloride                                                                |
| 7       | 61546-01-8 1-Hexadecyl-3-methylimidazolium chloride                                                                  |
| 8       | 171058-19-8 1-Methyl-3-octadecylimidazolium chloride                                                                 |
| 9       | 937720-90-6 1-(Cyanomethyl)-3-methylimidazolium 1,1,1-trifluoro-N-[(trifluoromethyl)sulfonyl]methanesulfonamide      |
| 10      | 154312-63-7 1-(Cyanomethyl)-3-methylimidazolium chloride                                                             |
| 11      | 1241842-28-3 1-[2-[1-(1,3-Benzodioxol-5-yl)-2-butoxy-2-oxoethoxy]-2-oxoethyl]-3-methylimidazolium bromide            |
| 12      | 945996-13-4 1-(Ethoxymethyl)-3-methylimidazolium 1,1,1-trifluoro-N-[(trifluoromethyl)sulfonyl]methanesulfonamide     |
| 13      | 945996-02-1 1-(Ethoxymethyl)-3-methylimidazolium chloride                                                            |
| 14      | 376650-04-3 1-Ethyl-3-methylimidazolium bis[1,2-benzenediolato(2-)-O1,O2]borate                                      |
| 15      | 852616-00-3 1-Ethyl-3-methylimidazolium bis(pentafluoroethyl)phosphinate                                             |
| 16      | 878005-11-9 1-Ethyl-3-methylimidazolium trifluorotris(pentafluoroethyl)phosphate                                     |
| 17      | 174899-82-2 1-Ethyl-3-methylimidazolium 1,1,1-trifluoro-N-[(trifluoromethyl)sulfonyl]methanesulfonamide              |
| 18      | 342573-75-5 1-Ethyl-3-methylimidazolium ethyl sulfate                                                                |
| 19      | 742099-80-5 1-Ethyl-3-methylimidazolium tetracyanoborate                                                             |
| 20      | 666823-18-3 1-Ethyl-3-methylimidazolium, salt with methanetricarbonitrile (1:1)                                      |
| 21      | 65039-09-0 1-Ethyl-3-methylimidazolium chloride                                                                      |
| 22      | 370865-89-7 1-Ethyl-3-methylimidazolium N-cyanocyanamide                                                             |
| 23      | 178631-01-1 1-(2-Methoxyethyl)-3-methylimidazolium 1,1,1-trifluoro-N-[(trifluoromethyl)sulfonyl]methanesulfonamide   |
| 24      | 474972-46-8 1-(2-Methoxyethyl)-3-methylimidazolium chloride                                                          |
| 25      | 778593-17-2 1-(2-Ethoxyethyl)-3-methylimidazolium 1,1,1-trifluoro-N-[(trifluoromethyl)sulfonyl]methanesulfonamide    |
| 26      | 1012793-99-5 1-(2-Ethoxyethyl)-3-methylimidazolium bromide                                                           |
| 27      | 474972-49-1 1-[2-(2-Methoxyethoxy)ethyl]-3-methylimidazolium chloride                                                |
| 28      | 1012794-00-1 1-(2-Hydroxyethyl)-3-methylimidazolium iodide                                                           |
| 29      | 216299-72-8 1-Methyl-3-propylimidazolium 1,1,1-trifluoro-N-[(trifluoromethyl)sulfonyl]methanesulfonamide             |
| 30      | 244193-48-4 1-Methyl-3-propylimidazolium tetrafluoroborate                                                           |
| 31      | 216300-12-8 1-Methyl-3-propylimidazolium hexafluorophosphate                                                         |
| 32      | 1015254-36-0 1-(3-Methoxypropyl)-3-methylimidazolium 1,1,1-trifluoro-N-[(trifluoromethyl)sulfonyl]methanesulfonamide |
| 33      | 1012794-06-7 1-(3-Methoxypropyl)-3-methylimidazolium chloride                                                        |
| 34      | 827027-30-5 1-(3-Hydroxypropyl)-3-methylimidazolium 1,1,1-trifluoro-N-[(trifluoromethyl)sulfonyl]methanesulfonamide  |
| 35      | 355011-34-6 1-(3-Hydroxypropyl)-3-methylimidazolium chloride                                                         |
| 36      | 710336-91-7 1-Butyl-3-methylimidazolium 1,1,1-trifluoro-N-(trifluoromethyl)methanamine                               |
| 37      | 174899-83-3 1-Butyl-3-methylimidazolium 1,1,1-trifluoro-N-[(trifluoromethyl)sulfonyl]methanesulfonamide              |
| 38      | 342789-81-5 1-Butyl-3-methylimidazolium methanesulfonate                                                             |
| 39      | 410522-18-8 1-Butyl-3-methylimidazolium 4-methylbenzenesulfonate                                                     |
| 40      | 445473-58-5 1-Butyl-3-methylimidazolium octylsulfate                                                                 |
| 41      | 174501-65-6 1-Butyl-3-methylimidazolium tetrafluoroborate                                                            |
| 42      | 85100-77-2 1-Butyl-3-methylimidazolium bromide                                                                       |
| 43      | 174899-66-2 1-Butyl-3-methylimidazolium trifluoromethanesulfonate                                                    |
| 44      | 79917-90-1 1-Butyl-3-methylimidazolium chloride                                                                      |
| 45      | 65039-05-6 1-Butyl-3-methylimidazolium iodide                                                                        |
| 46      | 448245-52-1 1-Butyl-3-methylimidazolium N-cyanocyanamide                                                             |
| 47      | none (2013-09-19) 1-Butyl-3-methylimidazolium hexafluorophosphate                                                    |
| 48      | 350493-08-2 1-Butyl-2,3-dimethylimidazolium 1,1,1-trifluoro-N-[(trifluoromethyl)sulfonyl]methanesulfonamide          |
| 49      | 280779-53-5 1-Methyl-3-pentylimidazolium 1,1,1-trifluoro-N-[(trifluoromethyl)sulfonyl]methanesulfonamide             |
| 50      | 244193-49-5 1-Methyl-3-pentylimidazolium tetrafluoroborate                                                           |
| 51      | 697248-62-7 1-Hexyl-3-methylimidazolium, salt with 1,2-benzisothiazol-3(2H)-one 1,1-dioxide (1:1)                    |
| 52      | 382150-50-7 1-Hexyl-3-methylimidazolium 1,1,1-trifluoro-N-[(trifluoromethyl)sulfonyl]methanesulfonamide              |
| 53      | 244193-50-8 1-Hexyl-3-methylimidazolium tetrafluoroborate                                                            |
| 54      | 85100-78-3 1-Hexyl-3-methylimidazolium bromide                                                                       |
| 55      | 171058-17-6 1-Hexyl-3-methylimidazolium chloride                                                                     |

|     |                   |                                                                                                               |
|-----|-------------------|---------------------------------------------------------------------------------------------------------------|
| 56  | 304680-35-1       | 1-Hexyl-3-methylimidazolium hexafluorophosphate                                                               |
| 57  | 425382-14-5       | 1-Heptyl-3-methylimidazolium 1,1,1-trifluoro-N-[(trifluoromethyl)sulfonyl]methanesulfonamide                  |
| 58  | 244193-51-9       | 1-Heptyl-3-methylimidazolium tetrafluoroborate                                                                |
| 59  | 178631-04-4       | 1-Methyl-3-octylimidazolium 1,1,1-trifluoro-N-[(trifluoromethyl)sulfonyl]methanesulfonamide                   |
| 60  | 244193-52-0       | 1-Methyl-3-octylimidazolium tetrafluoroborate                                                                 |
| 61  | 61545-99-1        | 1-Methyl-3-octylimidazolium bromide                                                                           |
| 62  | 244193-55-3       | 1-Methyl-3-nonylimidazolium tetrafluoroborate                                                                 |
| 63  | none (2013-09-19) | 1-Methyl-3-(2-methylpropyl)imidazolium 1,1,1-trifluoro-N-[(trifluoromethyl)sulfonyl]methanesulfonamide        |
| 64  | 174899-88-8       | 1,3-Diethylimidazolium 1,1,1-trifluoro-N-[(trifluoromethyl)sulfonyl]methanesulfonamide                        |
| 65  | 347882-21-7       | 1-Ethyl-3-propylimidazolium 1,1,1-trifluoro-N-[(trifluoromethyl)sulfonyl]methanesulfonamide                   |
| 66  | 393550-29-3       | 1-Ethyl-3-hexylimidazolium tetrafluoroborate                                                                  |
| 67  | none (2013-09-19) | 1,3-Dipropylimidazolium 1,1,1-trifluoro-N-[(trifluoromethyl)sulfonyl]methanesulfonamide                       |
| 68  | 749921-07-1       | 1,3-Dibutylimidazolium 1,1,1-trifluoro-N-[(trifluoromethyl)sulfonyl]methanesulfonamide                        |
| 69  | none (2013-09-19) | 1,3-Dipentylimidazolium 1,1,1-trifluoro-N-[(trifluoromethyl)sulfonyl]methanesulfonamide                       |
| 70  | none (2013-09-19) | 1,3-Dihexylimidazolium 1,1,1-trifluoro-N-[(trifluoromethyl)sulfonyl]methanesulfonamide                        |
| 71  | 1049751-90-7      | 4-(Ethoxymethyl)-4-methylmorpholinium 1,1,1-trifluoro-N-[(trifluoromethyl)sulfonyl]methanesulfonamide         |
| 72  | 324574-95-0       | 4-Butyl-4-methylmorpholinium 1,1,1-trifluoro-N-[(trifluoromethyl)sulfonyl]methanesulfonamide                  |
| 73  | 75174-77-5        | 4-Butyl-4-methylmorpholinium bromide                                                                          |
| 74  | 608140-12-1       | 1-Methyl-1-propylpiperidinium 1,1,1-trifluoro-N-[(trifluoromethyl)sulfonyl]methanesulfonamide                 |
| 75  | none (2013-09-19) | 1-Methyl-1-propylpiperidinium hexafluorophosphate                                                             |
| 76  | 1049751-95-2      | 1-(3-Methoxypropyl)-1-methylpiperidinium 1,1,1-trifluoro-N-[(trifluoromethyl)sulfonyl]methanesulfonamide      |
| 77  | 623580-02-9       | 1-Butyl-1-methylpiperidinium 1,1,1-trifluoro-N-[(trifluoromethyl)sulfonyl]methanesulfonamide                  |
| 78  | 94280-72-5        | 1-Butyl-1-methylpiperidinium bromide                                                                          |
| 79  | 1241842-94-3      | 1-[1-(1,3-Benzodioxol-5-yl)-2-methoxy-2-oxoethyl]pyridinium bromide                                           |
| 80  | 1241840-01-6      | 1-[1-(3,4-Dimethoxyphenyl)-2-methoxy-2-oxoethyl]pyridinium chloride                                           |
| 81  | 1424967-13-4      | 1-[1-(1,3-Benzodioxol-5-yl)-2-butoxy-2-oxoethyl]pyridinium bromide                                            |
| 82  | 1241839-96-2      | 1-[2-[1-(1,3-Benzodioxol-5-yl)-2-methoxy-2-oxoethoxy]-2-oxoethyl]pyridinium bromide                           |
| 83  | 827027-29-2       | 1-(3-Hydroxypropyl)pyridinium 1,1,1-trifluoro-N-[(trifluoromethyl)sulfonyl]methanesulfonamide                 |
| 84  | 67226-45-3        | 1-Butylpyridinium $\mu$ -chlorohexachlorodialuminate                                                          |
| 85  | 874-80-6          | 1-Butylpyridinium bromide                                                                                     |
| 86  | 1124-64-7         | 1-Butylpyridinium chloride                                                                                    |
| 87  | 827033-71-6       | 1-Butylpyridinium N-cyanocyanamide                                                                            |
| 88  | 26576-85-2        | 1-Butyl-3-methylpyridinium bromide                                                                            |
| 89  | 712355-12-9       | 1-Butyl-3-methylpyridinium N-cyanocyanamide                                                                   |
| 90  | 26576-98-7        | 1-Butyl-3,5-dimethylpyridinium bromide                                                                        |
| 91  | 877678-54-1       | 1-Butyl-3,5-dimethylpyridinium N-cyanocyanamide                                                               |
| 92  | 343952-33-0       | 1-Butyl-4-methylpyridinium tetrafluoroborate                                                                  |
| 93  | 460983-97-5       | 1-Hexylpyridinium 1,1,1-trifluoro-N-[(trifluoromethyl)sulfonyl]methanesulfonamide                             |
| 94  | 67021-56-1        | 1-Hexyl-3-methylpyridinium bromide                                                                            |
| 95  | 872672-57-6       | 4-(Dimethylamino)-1-hexylpyridinium 1,1,1-trifluoro-N-[(trifluoromethyl)sulfonyl]methanesulfonamide           |
| 96  | 4086-73-1         | 1-Octylpyridinium chloride                                                                                    |
| 97  | 872672-72-5       | 3-Methyl-1-octylpyridinium bromide                                                                            |
| 98  | 1107545-20-9      | 1-(2-Ethoxy-2-oxoethyl)-1-methylpyrrolidinium 1,1,1-trifluoro-N-[(trifluoromethyl)sulfonyl]methanesulfonamide |
| 99  | 129412-64-2       | 1-(2-Ethoxy-2-oxoethyl)-1-methylpyrrolidinium bromide                                                         |
| 100 | 757240-24-7       | 1-(2-Methoxyethyl)-1-methylpyrrolidinium 1,1,1-trifluoro-N-[(trifluoromethyl)sulfonyl]methanesulfonamide      |
| 101 | 663628-46-4       | 1-(2-Ethoxyethyl)-1-methylpyrrolidinium 1,1,1-trifluoro-N-[(trifluoromethyl)sulfonyl]methanesulfonamide       |
| 102 | 1332694-08-2      | 1-(3-Hydroxypropyl)-1-methylpyrrolidinium 1,1,1-trifluoro-N-[(trifluoromethyl)sulfonyl]methanesulfonamide     |
| 103 | 479500-35-1       | 1-Butyl-1-methylpyrrolidinium chloride                                                                        |
| 104 | 380497-19-8       | 1-Hexyl-1-methylpyrrolidinium 1,1,1-trifluoro-N-[(trifluoromethyl)sulfonyl]methanesulfonamide                 |

**S4:** The 6 Variables in the Aquatic toxicity model.

---

|          | <b>Variables</b>                               | <b>unit</b> |
|----------|------------------------------------------------|-------------|
| <b>1</b> | <i>Lemna minor</i> (frond area) 7d             | log(EC50)   |
| <b>2</b> | <i>Lemna minor</i> (frond number) 7d           | log(EC50)   |
| <b>3</b> | <i>Scenedesmus vacuolatus</i> (cell count) 24h | log(EC50)   |
| <b>4</b> | <i>Vibrio fischeri</i> 5'                      | log(EC50)   |
| <b>5</b> | <i>Vibrio fischeri</i> 15'                     | log(EC50)   |
| <b>6</b> | <i>Vibrio fischeri</i> 30'                     | log(EC50)   |

---

S5: Ranking of the 245 IPC-81 variables according to decreasing values.

|    | CAS no.      | Name                                                                                                 | IPC-81<br>log (EC50) |
|----|--------------|------------------------------------------------------------------------------------------------------|----------------------|
| 1  | 941584-15-2  | 1-(3-Hydroxypropyl)-1-methylpyrrolidinium chloride                                                   | 4,30                 |
| 2  | 67889-35-4   | 1-(2-Hydroxyethyl)-1-methylpiperidinium iodide                                                       | 4,01                 |
| 3  | 1012794-05-6 | 1-(3-Methoxypropyl)-1-methylpyrrolidinium chloride                                                   | 3,99                 |
| 4  | 886439-37-8  | 1-(2-Methoxyethyl)-1-methylpiperidinium bromide                                                      | 3,98                 |
| 5  | 1012794-07-8 | 1-(3-Methoxypropyl)pyridinium chloride                                                               | 3,88                 |
| 6  | 194986-67-9  | 1-(Cyanomethyl)-1-methylpiperidinium chloride                                                        | 3,82                 |
| 7  | 1012794-12-5 | 4-(3-Methoxypropyl)-4-methylmorpholinium chloride                                                    | 3,80                 |
| 8  | 873-71-2     | 1-Propylpyridinium bromide                                                                           | 3,78                 |
| 9  | 1012794-06-7 | 1-(3-Methoxypropyl)-3-methylimidazolium chloride                                                     | 3,77                 |
| 10 | 1334291-67-6 | 1-(3-Hydroxypropyl)-1-methylpiperidinium chloride                                                    | 3,76                 |
| 11 | 53875-78-8   | 4-(2-Hydroxyethyl)-4-methylmorpholinium iodide                                                       | 3,74                 |
| 12 | 1012794-04-5 | 1-(3-Methoxypropyl)-1-methylpiperidinium chloride                                                    | 3,72                 |
| 13 | 54770-67-1   | 1-(2-Hydroxyethyl)-1-methylpyrrolidinium iodide                                                      | 3,71                 |
| 14 | 663628-44-2  | 1-(2-Ethoxyethyl)-1-methylpiperidinium bromide                                                       | 3,71                 |
| 15 | 1012794-00-1 | 1-(2-Hydroxyethyl)-3-methylimidazolium iodide                                                        | 3,71                 |
| 16 | 1012794-09-0 | 4-(2-Ethoxyethyl)-4-methylmorpholinium bromide                                                       | 3,71                 |
| 17 | 75174-77-5   | 4-Butyl-4-methylmorpholinium bromide                                                                 | 3,68                 |
| 18 | 833446-39-2  | 1-(2-Ethoxyethyl)-1-methylpyrrolidinium bromide                                                      | 3,68                 |
| 19 | 108153-25-9  | 1-(2-Ethoxyethyl)pyridinium bromide                                                                  | 3,61                 |
| 20 | 1012794-10-3 | 4-(2-Methoxyethyl)-4-methylmorpholinium chloride                                                     | 3,59                 |
| 21 | 1012794-11-4 | 4-(3-Hydroxypropyl)-4-methylmorpholinium chloride                                                    | 3,59                 |
| 22 | 1309983-34-3 | 1-(Cyanomethyl)-1-methylpiperidinium 1,1,1-trifluoro-N-[(trifluoromethyl)sulfonyl]methanesulfonamide | 3,57                 |
| 23 | 1012794-01-2 | 1-(2-Methoxyethyl)-1-methylpyrrolidinium chloride                                                    | 3,56                 |
| 24 | 69095-13-2   | 1-(2-Hydroxyethyl)pyridinium iodide                                                                  | 3,55                 |
| 25 | 370865-80-8  | 1-Butyl-1-methylpyrrolidinium N-cyanocyanamide                                                       | 3,55                 |
| 26 | 479500-35-1  | 1-Butyl-1-methylpyrrolidinium chloride                                                               | 3,55                 |
| 27 | 474972-46-8  | 1-(2-Methoxyethyl)-3-methylimidazolium chloride                                                      | 3,55                 |
| 28 | 355011-34-6  | 1-(3-Hydroxypropyl)-3-methylimidazolium chloride                                                     | 3,55                 |
| 29 | 1012794-13-6 | 4-(Cyanomethyl)-4-methylmorpholinium chloride                                                        | 3,55                 |
| 30 | 516474-01-4  | 1-Ethyl-3-methylimidazolium methyl sulfate                                                           | 3,54                 |
| 31 | 209679-88-9  | 1-(2-Methoxyethyl)pyridinium chloride                                                                | 3,54                 |
| 32 | 187863-16-7  | 1-(3-Hydroxypropyl)pyridinium chloride                                                               | 3,54                 |
| 33 | 1012794-08-9 | 1-(Ethoxymethyl)-1-methylpiperidinium chloride                                                       | 3,52                 |
| 34 | 1012793-99-5 | 1-(2-Ethoxyethyl)-3-methylimidazolium bromide                                                        | 3,51                 |



|    |              |                                                                                                               |      |
|----|--------------|---------------------------------------------------------------------------------------------------------------|------|
| 35 | 79917-89-8   | 1-Methyl-3-propylimidazolium chloride                                                                         | 3,51 |
| 36 | 937720-90-6  | 1-(Cyanomethyl)-3-methylimidazolium 1,1,1-trifluoro-N-[(trifluoromethyl)sulfonyl]methanesulfonamide           | 3,51 |
| 37 | 145022-44-2  | 1-Ethyl-3-methylimidazolium trifluoromethanesulfonate                                                         | 3,50 |
| 38 | 154312-63-7  | 1-(Cyanomethyl)-3-methylimidazolium chloride                                                                  | 3,50 |
| 39 | 143314-17-4  | 1-Ethyl-3-methylimidazolium acetate                                                                           | 3,46 |
| 40 | 331717-63-6  | 1-Ethyl-3-methylimidazolium thiocyanate                                                                       | 3,45 |
| 41 | 796039-07-1  | 4-(2-Methoxyethyl)-4-methylmorpholinium 1,1,1-trifluoro-N-[(trifluoromethyl)sulfonyl]methanesulfonamide       | 3,45 |
| 42 | 941580-56-9  | 1-(3-Sulfopropyl)pyridinium trifluoromethanesulfonate                                                         | 3,45 |
| 43 | 194986-69-1  | 1-(Cyanomethyl)-1-methylpyrrolidinium chloride                                                                | 3,44 |
| 44 | 1049751-91-8 | 4-(3-Methoxypropyl)-4-methylmorpholinium 1,1,1-trifluoro-N-[(trifluoromethyl)sulfonyl]methanesulfonamide      | 3,43 |
| 45 | 1017553-47-7 | 1-(Cyanomethyl)-1-methylpyrrolidinium 1,1,1-trifluoro-N-[(trifluoromethyl)sulfonyl]methanesulfonamide         | 3,41 |
| 46 | 94280-72-5   | 1-Butyl-1-methylpiperidinium bromide                                                                          | 3,41 |
| 47 | 1373334-04-3 | 1-(3-Methoxypropyl)-1-methylpyrrolidinium 1,1,1-trifluoro-N-[(trifluoromethyl)sulfonyl]methanesulfonamide     | 3,40 |
| 48 | 752260-02-9  | 1-(2-Hydroxyethyl)pyridinium 1,1,1-trifluoro-N-[(trifluoromethyl)sulfonyl]methanesulfonamide                  | 3,40 |
| 49 | 2294-38-4    | 1-Ethylpyridinium chloride                                                                                    | 3,38 |
| 50 | 174899-86-6  | 1-(2-Hydroxyethyl)-3-methylimidazolium 1,1,1-trifluoro-N-[(trifluoromethyl)sulfonyl]methanesulfonamide        | 3,37 |
| 51 | 174899-65-1  | 1-Ethyl-3-methylimidazolium trifluoroacetate                                                                  | 3,35 |
| 52 | 663628-48-6  | 4-(2-Ethoxyethyl)-4-methylmorpholinium 1,1,1-trifluoro-N-[(trifluoromethyl)sulfonyl]methanesulfonamide        | 3,35 |
| 53 | 790663-77-3  | 1-Ethyl-3-methylimidazolium 2-(2-methoxyethoxy)ethyl sulfate                                                  | 3,34 |
| 54 | 757212-04-7  | 1-(2-Hydroxyethyl)-1-methylpyrrolidinium 1,1,1-trifluoro-N-[(trifluoromethyl)sulfonyl]methanesulfonamide      | 3,33 |
| 55 | 885456-20-2  | 1-Butylpyridinium methyl sulfate                                                                              | 3,31 |
| 56 | 412009-61-1  | 1-Ethyl-3-methylimidazolium hydrogen sulfate                                                                  | 3,31 |
| 57 | 342573-75-5  | 1-Ethyl-3-methylimidazolium ethyl sulfate                                                                     | 3,30 |
| 58 | 186088-50-6  | 1-Butylpyridinium hexafluorophosphate                                                                         | 3,30 |
| 59 | 445497-25-6  | 4-Ethyl-4-methylmorpholinium 4-methylbenzenesulfonate                                                         | 3,29 |
| 60 | 145022-45-3  | 1-Ethyl-3-methylimidazolium methanesulfonate                                                                  | 3,29 |
| 61 | 827027-30-5  | 1-(3-Hydroxypropyl)-3-methylimidazolium 1,1,1-trifluoro-N-[(trifluoromethyl)sulfonyl]methanesulfonamide       | 3,29 |
| 62 | 757212-03-6  | 1-(2-Hydroxyethyl)-1-methylpiperidinium 1,1,1-trifluoro-N-[(trifluoromethyl)sulfonyl]methanesulfonamide       | 3,28 |
| 63 | 328090-25-1  | 1-Ethyl-3-methylimidazolium 4-methylbenzenesulfonate                                                          | 3,26 |
| 64 | 1107545-20-9 | 1-(2-Ethoxy-2-oxoethyl)-1-methylpyrrolidinium 1,1,1-trifluoro-N-[(trifluoromethyl)sulfonyl]methanesulfonamide | 3,25 |
| 65 | 1049751-96-3 | 1-(3-Hydroxypropyl)-1-methylpiperidinium 1,1,1-trifluoro-N-[(trifluoromethyl)sulfonyl]methanesulfonamide      | 3,25 |
| 66 | 129412-64-2  | 1-(2-Ethoxy-2-oxoethyl)-1-methylpyrrolidinium bromide                                                         | 3,25 |
| 67 | 874-80-6     | 1-Butylpyridinium bromide                                                                                     | 3,24 |
| 68 | 1332694-08-2 | 1-(3-Hydroxypropyl)-1-methylpyrrolidinium 1,1,1-trifluoro-N-[(trifluoromethyl)sulfonyl]methanesulfonamide     | 3,23 |
| 69 | 1196206-01-5 | 1-Hexyl-3-methylimidazolium tris[(trifluoromethyl)sulfonyl]methide (1:1)                                      | 3,20 |
| 70 | 1026019-24-8 | 4-(3-Hydroxypropyl)-4-methylmorpholinium 1,1,1-trifluoro-N-[(trifluoromethyl)sulfonyl]methanesulfonamide      | 3,19 |
| 71 | 67226-45-3   | 1-Butylpyridinium $\mu$ -chlorohexachlorodialuminate                                                          | 3,18 |
| 72 | 778593-17-2  | 1-(2-Ethoxyethyl)-3-methylimidazolium 1,1,1-trifluoro-N-[(trifluoromethyl)sulfonyl]methanesulfonamide         | 3,18 |
| 73 | 827027-29-2  | 1-(3-Hydroxypropyl)pyridinium 1,1,1-trifluoro-N-[(trifluoromethyl)sulfonyl]methanesulfonamide                 | 3,17 |
| 74 | 65039-09-0   | 1-Ethyl-3-methylimidazolium chloride                                                                          | 3,16 |

|     |              |                                                                                                          |      |
|-----|--------------|----------------------------------------------------------------------------------------------------------|------|
| 75  | 1040381-03-0 | 4-(Cyanomethyl)-4-methylmorpholinium 1,1,1-trifluoro-N-[(trifluoromethyl)sulfonyl]methanesulfonamide     | 3,16 |
| 76  | 125652-55-3  | 1-Butyl-3-methylpyridinium chloride                                                                      | 3,12 |
| 77  | 390423-43-5  | 1-Butylpyridinium trifluoromethanesulfonate                                                              | 3,12 |
| 78  | 93457-69-3   | 1-Butyl-1-methylpyrrolidinium bromide                                                                    | 3,11 |
| 79  | 1017553-46-6 | 1-(Cyanomethyl)pyridinium 1,1,1-trifluoro-N-[(trifluoromethyl)sulfonyl]methanesulfonamide                | 3,10 |
| 80  | 324574-95-0  | 4-Butyl-4-methylmorpholinium 1,1,1-trifluoro-N-[(trifluoromethyl)sulfonyl]methanesulfonamide             | 3,07 |
| 81  | 370865-89-7  | 1-Ethyl-3-methylimidazolium N-cyanocyanamide                                                             | 3,07 |
| 82  | 1049751-90-7 | 4-(Ethoxymethyl)-4-methylmorpholinium 1,1,1-trifluoro-N-[(trifluoromethyl)sulfonyl]methanesulfonamide    | 3,06 |
| 83  | 1049751-93-0 | 1-(Ethoxymethyl)-1-methylpiperidinium 1,1,1-trifluoro-N-[(trifluoromethyl)sulfonyl]methanesulfonamide    | 3,05 |
| 84  | 623580-02-9  | 1-Butyl-1-methylpiperidinium 1,1,1-trifluoro-N-[(trifluoromethyl)sulfonyl]methanesulfonamide             | 3,05 |
| 85  | 1049752-00-2 | 1-(3-Methoxypropyl)pyridinium 1,1,1-trifluoro-N-[(trifluoromethyl)sulfonyl]methanesulfonamide            | 3,02 |
| 86  | 112400-85-8  | 1-Butyl-2-methylpyridinium chloride                                                                      | 3,02 |
| 87  | 663628-45-3  | 1-(2-Ethoxyethyl)-1-methylpiperidinium 1,1,1-trifluoro-N-[(trifluoromethyl)sulfonyl]methanesulfonamide   | 3,00 |
| 88  | 1015254-36-0 | 1-(3-Methoxypropyl)-3-methylimidazolium 1,1,1-trifluoro-N-[(trifluoromethyl)sulfonyl]methanesulfonamide  | 2,98 |
| 89  | 17281-59-3   | 1-(Cyanomethyl)pyridinium chloride                                                                       | 2,98 |
| 90  | 952429-64-0  | 1-(7-Carboxyheptyl)-3-methylimidazolium bromide                                                          | 2,96 |
| 91  | 203389-28-0  | 1-Butylpyridinium tetrafluoroborate                                                                      | 2,95 |
| 92  | 845835-03-2  | 1-Butyl-3-methylpyridinium hexafluorophosphate                                                           | 2,94 |
| 93  | 757240-24-7  | 1-(2-Methoxyethyl)-1-methylpyrrolidinium 1,1,1-trifluoro-N-[(trifluoromethyl)sulfonyl]methanesulfonamide | 2,93 |
| 94  | 1049751-95-2 | 1-(3-Methoxypropyl)-1-methylpiperidinium 1,1,1-trifluoro-N-[(trifluoromethyl)sulfonyl]methanesulfonamide | 2,92 |
| 95  | 174899-82-2  | 1-Ethyl-3-methylimidazolium 1,1,1-trifluoro-N-[(trifluoromethyl)sulfonyl]methanesulfonamide              | 2,91 |
| 96  | 145022-48-6  | 1-Butyl-3-ethylimidazolium trifluoromethanesulfonate                                                     | 2,91 |
| 97  | 65039-05-6   | 1-Butyl-3-methylimidazolium iodide                                                                       | 2,91 |
| 98  | 849418-12-8  | 1-(2-Ethoxyethyl)pyridinium 1,1,1-trifluoro-N-[(trifluoromethyl)sulfonyl]methanesulfonamide              | 2,90 |
| 99  | 873583-83-6  | 1-(2-Methoxyethyl)-1-methylpiperidinium 1,1,1-trifluoro-N-[(trifluoromethyl)sulfonyl]methanesulfonamide  | 2,89 |
| 100 | 1373334-02-1 | 1-(Ethoxymethyl)-1-methylpyrrolidinium 1,1,1-trifluoro-N-[(trifluoromethyl)sulfonyl]methanesulfonamide   | 2,89 |
| 101 | 342789-81-5  | 1-Butyl-3-methylimidazolium methanesulfonate                                                             | 2,88 |
| 102 | 178631-01-1  | 1-(2-Methoxyethyl)-3-methylimidazolium 1,1,1-trifluoro-N-[(trifluoromethyl)sulfonyl]methanesulfonamide   | 2,88 |
| 103 | 742099-80-5  | 1-Ethyl-3-methylimidazolium tetracyanoborate                                                             | 2,86 |
| 104 | 945996-02-1  | 1-(Ethoxymethyl)-3-methylimidazolium chloride                                                            | 2,85 |
| 105 | 952429-67-3  | 1-Methyl-3-(3-oxobutyl)imidazolium bromide                                                               | 2,84 |
| 106 | 663628-46-4  | 1-(2-Ethoxyethyl)-1-methylpyrrolidinium 1,1,1-trifluoro-N-[(trifluoromethyl)sulfonyl]methanesulfonamide  | 2,84 |
| 107 | 628-13-7     | Pyridine hydrochloride                                                                                   | 2,83 |
| 108 | 945996-13-4  | 1-(Ethoxymethyl)-3-methylimidazolium 1,1,1-trifluoro-N-[(trifluoromethyl)sulfonyl]methanesulfonamide     | 2,83 |
| 109 | 868742-24-9  | 4-(2-Hydroxyethyl)-4-methylmorpholinium 1,1,1-trifluoro-N-[(trifluoromethyl)sulfonyl]methanesulfonamide  | 2,82 |
| 110 | 374564-83-7  | 1-(2-Hydroxyethyl)-3-methylimidazolium tetrafluoroborate                                                 | 2,81 |
| 111 | 1012794-15-8 | 4-(Ethoxymethyl)-4-methylmorpholinium chloride                                                           | 2,81 |
| 112 | 863663-01-8  | 1-(2-Methoxyethyl)pyridinium 1,1,1-trifluoro-N-[(trifluoromethyl)sulfonyl]methanesulfonamide             | 2,81 |
| 113 | 1104525-90-7 | 1-Propylpyridinium 1,1,1-trifluoro-N-[(trifluoromethyl)sulfonyl]methanesulfonamide                       | 2,81 |
| 114 | 79917-90-1   | 1-Butyl-3-methylimidazolium chloride                                                                     | 2,80 |

|     |                   |                                                                                               |      |
|-----|-------------------|-----------------------------------------------------------------------------------------------|------|
| 115 | 712355-12-9       | 1-Butyl-3-methylpyridinium N-cyanocyanamide                                                   | 2,79 |
| 116 | 805228-35-7       | 3-(3-Carboxypropyl)-1-methylimidazolium chloride                                              | 2,79 |
| 117 | 244193-48-4       | 1-Methyl-3-propylimidazolium tetrafluoroborate                                                | 2,78 |
| 118 | 410522-18-8       | 1-Butyl-3-methylimidazolium 4-methylbenzenesulfonate                                          | 2,78 |
| 119 | 608140-12-1       | 1-Methyl-1-propylpiperidinium 1,1,1-trifluoro-N-[(trifluoromethyl)sulfonyl]methanesulfonamide | 2,78 |
| 120 | 445473-58-5       | 1-Butyl-3-methylimidazolium octylsulfate                                                      | 2,77 |
| 121 | 85100-77-2        | 1-Butyl-3-methylimidazolium bromide                                                           | 2,77 |
| 122 | 864665-30-5       | 1-(4-Hydroxybutyl)-3-methylimidazolium chloride                                               | 2,76 |
| 123 | 1049751-98-5      | 1-(Ethoxymethyl)pyridinium 1,1,1-trifluoro-N-[(trifluoromethyl)sulfonyl]methanesulfonamide    | 2,74 |
| 124 | 174899-96-8       | 1-Butyl-3-ethylimidazolium trifluoroacetate                                                   | 2,74 |
| 125 | 143314-16-3       | 1-Ethyl-3-methylimidazolium tetrafluoroborate                                                 | 2,73 |
| 126 | 790663-79-5       | 1-Ethyl-3-methylimidazolium octylsulfate                                                      | 2,73 |
| 127 | 916730-31-9       | 1-Butyl-3,5-dimethylpyridinium chloride                                                       | 2,72 |
| 128 | 359845-21-9       | 1-Butyl-3-methylimidazolium tetrachloroferrate                                                | 2,70 |
| 129 | 1187194-44-0      | 1-(2-Ethoxy-2-oxoethyl)-1-methylpyrrolidinium tris(pentafluoroethyl)trifluorophosphate        | 2,70 |
| 130 | 595565-54-1       | 1-Butyl-3-methylimidazolium-2-(2-methoxyethoxy)ethyl sulfate                                  | 2,69 |
| 131 | 597581-48-1       | 1-Butyl-3-methylpyridinium tetrafluoroborate                                                  | 2,68 |
| 132 | 262297-13-2       | 1-Butyl-3-methylimidazolium hydrogen sulfate                                                  | 2,66 |
| 133 | 952429-72-0       | 1-Butyl-3,5-dimethylpyridinium tetrafluoroborate                                              | 2,65 |
| 134 | 637348-59-5       | 1-Ethyl-3-propylimidazolium bromide                                                           | 2,64 |
| 135 | 581101-91-9       | 1-Butyl-3-ethylimidazolium tetrafluoroborate                                                  | 2,64 |
| 136 | 223437-11-4       | 1-Butyl-1-methylpyrrolidinium 1,1,1-trifluoro-N-[(trifluoromethyl)sulfonyl]methanesulfonamide | 2,63 |
| 137 | 286453-46-1       | 1-Butyl-2-methylpyridinium tetrafluoroborate                                                  | 2,62 |
| 138 | 401788-98-5       | 1-Butyl-3-methylimidazolium methyl sulfate                                                    | 2,61 |
| 139 | 1739-84-0         | 1,2-Dimethylimidazolium                                                                       | 2,61 |
| 140 | 666823-18-3       | 1-Ethyl-3-methylimidazolium, salt with methanetricarbonitrile (1:1)                           | 2,60 |
| 141 | 112400-86-9       | 1-Butyl-4-methylpyridinium chloride                                                           | 2,59 |
| 142 | 21379-36-2        | 1-(Ethoxymethyl)pyridinium chloride                                                           | 2,56 |
| 143 | none (2013-09-19) | 1-Butyl-3-methylimidazolium hexafluorophosphate                                               | 2,55 |
| 144 | 460983-97-5       | 1-Hexylpyridinium 1,1,1-trifluoro-N-[(trifluoromethyl)sulfonyl]methanesulfonamide             | 2,52 |
| 145 | 53385-72-1        | 1-Pentylpyridinium bromide                                                                    | 2,51 |
| 146 | 433337-11-2       | 1-Methyl-3-(phenylmethyl)imidazolium hexafluorophosphate                                      | 2,50 |
| 147 | 890532-45-3       | 1-Pentylpyridinium 1,1,1-trifluoro-N-[(trifluoromethyl)sulfonyl]methanesulfonamide            | 2,49 |
| 148 | 174899-66-2       | 1-Butyl-3-methylimidazolium trifluoromethanesulfonate                                         | 2,48 |
| 149 | 280779-52-4       | 1-Methyl-3-pentylimidazolium hexafluorophosphate                                              | 2,47 |
| 150 | 401788-99-6       | 1-Butyl-4-methylpyridinium hexafluorophosphate                                                | 2,47 |
| 151 | 174501-65-6       | 1-Butyl-3-methylimidazolium tetrafluoroborate                                                 | 2,47 |
| 152 | 448245-52-1       | 1-Butyl-3-methylimidazolium N-cyanocyanamide                                                  | 2,47 |
| 153 | 433337-12-3       | 1-Methyl-3-(2-phenylethyl)imidazolium hexafluorophosphate                                     | 2,45 |
| 154 | 852616-00-3       | 1-Ethyl-3-methylimidazolium bis(pentafluoroethyl)phosphinate                                  | 2,45 |

|     |              |                                                                                                     |      |
|-----|--------------|-----------------------------------------------------------------------------------------------------|------|
| 155 | 216300-12-8  | 1-Methyl-3-propylimidazolium hexafluorophosphate                                                    | 2,43 |
| 156 | 900797-77-5  | 4-(Dimethylamino)-1-ethylpyridinium 1,1,1-trifluoro-N-[(trifluoromethyl)sulfonyl]methanesulfonamide | 2,43 |
| 157 | 952429-71-9  | 1-Butyl-3,4-dimethylpyridinium tetrafluoroborate                                                    | 2,42 |
| 158 | 376650-06-5  | 1-Ethyl-3-methylimidazolium bis[ethanedioato-O1,O2]borate                                           | 2,41 |
| 159 | 304680-35-1  | 1-Hexyl-3-methylimidazolium hexafluorophosphate                                                     | 2,40 |
| 160 | 500996-04-3  | 1-Methyl-3-(phenylmethyl)imidazolium tetrafluoroborate                                              | 2,39 |
| 161 | 244193-50-8  | 1-Hexyl-3-methylimidazolium tetrafluoroborate                                                       | 2,39 |
| 162 | 244193-49-5  | 1-Methyl-3-pentylimidazolium tetrafluoroborate                                                      | 2,38 |
| 163 | 343952-33-0  | 1-Butyl-4-methylpyridinium tetrafluoroborate                                                        | 2,35 |
| 164 | 916730-30-8  | 1-Butyl-3,4-dimethylpyridinium chloride                                                             | 2,35 |
| 165 | 187332-85-0  | 1-Methyl-3-(2-phenylethyl)imidazolium chloride                                                      | 2,35 |
| 166 | 36443-80-8   | 1-Methyl-3-(phenylmethyl)imidazolium chloride                                                       | 2,32 |
| 167 | 151200-14-5  | 1-Methylimidazolium hydrogen tetrafluoroborate                                                      | 2,32 |
| 168 | 54304-66-4   | 1,3-Diethylimidazolium bromide                                                                      | 2,31 |
| 169 | 7538-79-6    | 4-(Dimethylamino)-1-methylpyridinium iodide                                                         | 2,31 |
| 170 | 174899-83-3  | 1-Butyl-3-methylimidazolium 1,1,1-trifluoro-N-[(trifluoromethyl)sulfonyl]methanesulfonamide         | 2,31 |
| 171 | 151263-00-2  | 1-(Ethoxymethyl)-1-methylpyrrolidinium chloride                                                     | 2,31 |
| 172 | 742099-83-8  | 1-Butyl-4-methylpyridinium tetracyanoborate                                                         | 2,30 |
| 173 | 171058-22-3  | 1-Methyl-3-pentylimidazolium chloride                                                               | 2,28 |
| 174 | 114203-57-5  | 4-(Dimethylamino)-1-ethylpyridinium bromide                                                         | 2,26 |
| 175 | 345984-11-4  | 1-Butyl-1-methylpyrrolidinium tetrafluoroborate                                                     | 2,26 |
| 176 | 909398-59-0  | 1-Hexyl-1-methylpyrrolidinium chloride                                                              | 2,24 |
| 177 | 380497-19-8  | 1-Hexyl-1-methylpyrrolidinium 1,1,1-trifluoro-N-[(trifluoromethyl)sulfonyl]methanesulfonamide       | 2,21 |
| 178 | 952429-66-2  | 1-Methyl-3-[(4-methylphenyl)methyl]imidazolium hexafluorophosphate                                  | 2,18 |
| 179 | 851856-47-8  | 1-Butyl-1-methylpyrrolidinium trifluorotris(pentafluoroethyl)phosphate                              | 2,18 |
| 180 | 171058-17-6  | 1-Hexyl-3-methylimidazolium chloride                                                                | 2,13 |
| 181 | 847335-66-4  | 1-Methyl-3-(phenylmethyl)imidazolium tetrafluoroborate                                              | 2,11 |
| 182 | 6220-15-1    | 1-Hexylpyridinium chloride                                                                          | 2,10 |
| 183 | 623167-81-7  | 1-Hexylpyridinium trifluoromethanesulfonate                                                         | 2,04 |
| 184 | 244193-51-9  | 1-Heptyl-3-methylimidazolium tetrafluoroborate                                                      | 2,01 |
| 185 | 797789-00-5  | 1-Hexylpyridinium hexafluorophosphate                                                               | 2,00 |
| 186 | 62409-49-8   | 1-Hexyl-4-methylpyridinium chloride                                                                 | 2,00 |
| 187 | 637348-60-8  | 1-Methyl-3-[(4-methylphenyl)methyl]imidazolium chloride                                             | 1,99 |
| 188 | 909398-60-3  | 1-Methyl-1-octylpyrrolidinium chloride                                                              | 1,96 |
| 189 | 1195983-48-2 | 1-(2-Methoxyethyl)-1-methylpyrrolidinium tris(pentafluoroethyl)trifluorophosphate                   | 1,93 |
| 190 | 765910-73-4  | 1-Butyl-2,3-dimethylimidazolium trifluoromethanesulfonate                                           | 1,91 |
| 191 | 382150-50-7  | 1-Hexyl-3-methylimidazolium 1,1,1-trifluoro-N-[(trifluoromethyl)sulfonyl]methanesulfonamide         | 1,89 |
| 192 | 581101-92-0  | 1-Heptyl-3-methylimidazolium chloride                                                               | 1,87 |
| 193 | 697248-62-7  | 1-Hexyl-3-methylimidazolium, salt with 1,2-benzisothiazol-3(2H)-one 1,1-dioxide (1:1)               | 1,85 |
| 194 | 174645-81-9  | 1-Butyl-3-methylimidazolium (OC-6-11)-hexafluoroantimonate                                          | 1,83 |

|     |              |                                                                                                     |      |
|-----|--------------|-----------------------------------------------------------------------------------------------------|------|
| 195 | 952429-65-1  | 1-(8-Hydroxyoctyl)-3-methylimidazolium bromide                                                      | 1,82 |
| 196 | 357915-04-9  | 1-Heptyl-3-methylimidazolium hexafluorophosphate                                                    | 1,82 |
| 197 | 31537-79-8   | 1-Butylquinolinium bromide                                                                          | 1,74 |
| 198 | 916730-40-0  | 1-Hexyl-3-methylpyridinium chloride                                                                 | 1,73 |
| 199 | 313475-50-2  | 1-Methyl-3-(3,3,4,4,5,5,6,6,7,7,8,8,8-tridecafluorooctyl)imidazolium hexafluorophosphate            | 1,70 |
| 200 | 393550-29-3  | 1-Ethyl-3-hexylimidazolium tetrafluoroborate                                                        | 1,69 |
| 201 | 710336-91-7  | 1-Butyl-3-methylimidazolium 1,1,1-trifluoro-N-(trifluoromethyl)methanamine                          | 1,65 |
| 202 | 952429-68-4  | 1-Butylquinolinium tetrafluoroborate                                                                | 1,60 |
| 203 | 952429-73-1  | 1-Hexyl-4-methylpyridinium tetrafluoroborate                                                        | 1,60 |
| 204 | 304680-36-2  | 1-Methyl-3-octylimidazolium hexafluorophosphate                                                     | 1,50 |
| 205 | 900797-79-7  | 1-Butyl-4-(dimethylamino)pyridinium 1,1,1-trifluoro-N-[(trifluoromethyl)sulfonyl]methanesulfonamide | 1,49 |
| 206 | 547719-00-6  | 1-Ethyl-3-hexylimidazolium bromide                                                                  | 1,41 |
| 207 | 343952-29-4  | 1-Methyl-3-nonylimidazolium hexafluorophosphate                                                     | 1,40 |
| 208 | 64697-40-1   | 1-Methyl-3-octylimidazolium chloride                                                                | 1,38 |
| 209 | 384347-21-1  | 1-Hexyl-2,3-dimethylimidazolium tetrafluoroborate                                                   | 1,33 |
| 210 | 178631-04-4  | 1-Methyl-3-octylimidazolium 1,1,1-trifluoro-N-[(trifluoromethyl)sulfonyl]methanesulfonamide         | 1,32 |
| 211 | 952429-74-2  | 1-Methyl-1-octylpyrrolidinium tetrafluoroborate                                                     | 1,28 |
| 212 | 82522-15-4   | 1-Butyl-4-(dimethylamino)pyridinium chloride                                                        | 1,27 |
| 213 | 713512-19-7  | 1-Hexyl-3-methylimidazolium trifluorotris(pentafluoroethyl)phosphate                                | 1,21 |
| 214 | 344790-87-0  | 1-Butyl-3-methylimidazolium thiocyanate                                                             | 1,18 |
| 215 | 917762-91-5  | 1-Butyl-3-methylimidazolium trifluorotris(pentafluoroethyl)phosphate                                | 1,14 |
| 216 | 817575-02-3  | 3-Methyl-1-octylimidazolium octylsulfate                                                            | 1,13 |
| 217 | 244193-55-3  | 1-Methyl-3-nonylimidazolium tetrafluoroborate                                                       | 1,12 |
| 218 | 362043-46-7  | 1-Decyl-3-methylimidazolium hexafluorophosphate                                                     | 1,06 |
| 219 | 244193-52-0  | 1-Methyl-3-octylimidazolium tetrafluoroborate                                                       | 1,04 |
| 220 | 141645-91-2  | 4-Methyl-1-octylpyridinium chloride                                                                 | 1,02 |
| 221 | 936239-96-2  | 4-Methyl-1-octylpyridinium tetrafluoroborate                                                        | 0,95 |
| 222 | 864461-36-9  | 3-Methyl-1-octylpyridinium chloride                                                                 | 0,85 |
| 223 | 171058-20-1  | 1-Methyl-3-nonylimidazolium chloride                                                                | 0,79 |
| 224 | 171058-18-7  | 1-Decyl-3-methylimidazolium chloride                                                                | 0,75 |
| 225 | 402846-78-0  | 1-Butyl-2,3-dimethylimidazolium tetrafluoroborate                                                   | 0,75 |
| 226 | 878005-11-9  | 1-Ethyl-3-methylimidazolium trifluorotris(pentafluoroethyl)phosphate                                | 0,75 |
| 227 | 872672-57-6  | 4-(Dimethylamino)-1-hexylpyridinium 1,1,1-trifluoro-N-[(trifluoromethyl)sulfonyl]methanesulfonamide | 0,70 |
| 228 | 4086-73-1    | 1-Octylpyridinium chloride                                                                          | 0,63 |
| 229 | 403842-84-2  | 1-Methyl-3-octylimidazolium trifluoromethanesulfonate                                               | 0,62 |
| 230 | 952429-69-5  | 1-Hexylquinolinium tetrafluoroborate                                                                | 0,55 |
| 231 | 376650-04-3  | 1-Ethyl-3-methylimidazolium bis[1,2-benzenediolato-O1,O2]borate                                     | 0,55 |
| 232 | 1012794-14-7 | 4-(Dimethylamino)-1-hexylpyridinium chloride                                                        | 0,32 |
| 233 | 244193-56-4  | 1-Decyl-3-methylimidazolium tetrafluoroborate                                                       | 0,26 |
| 234 | 581101-93-1  | 1-Decyl-3-ethylimidazolium bromide                                                                  | 0,03 |

|     |              |                                                                                                    |       |
|-----|--------------|----------------------------------------------------------------------------------------------------|-------|
| 235 | 943229-71-8  | 1-Hexyl-3-methylimidazolium trifluorotris(heptafluoropropyl)phosphate                              | -0,12 |
| 236 | 883860-38-6  | 1-Butyl-4-methylpyridinium trifluorotris(pentafluoroethyl)phosphate                                | -0,23 |
| 237 | 68039-12-3   | 1H-Imidazolium, 1-ethyl-2-(8-heptadecenyl)-4,5-dihydro-3-(2-hydroxyethyl)imidazolium ethyl sulfate | -0,23 |
| 238 | 188589-32-4  | 1-Decyl-3-methylimidazolium bromide                                                                | -0,25 |
| 239 | 952429-70-8  | 1-Octylquinolinium tetrafluoroborate                                                               | -0,31 |
| 240 | 1310460-36-6 | 1,3-Didecyl-2-methylimidazolium 1,1,1-trifluoro-N-[(trifluoromethyl)sulfonyl]methanesulfonamide    | -0,32 |
| 241 | 384347-06-2  | 1-Octylpyridinium 1,1,1-trifluoro-N-[(trifluoromethyl)sulfonyl]methanesulfonamide                  | -0,33 |
| 242 | 171058-19-8  | 1-Methyl-3-octadecylimidazolium chloride                                                           | -0,42 |
| 243 | 14848-21-6   | 1-Octylquinolinium bromide                                                                         | -0,52 |
| 244 | 61546-01-8   | 1-Hexadecyl-3-methylimidazolium chloride                                                           | -0,71 |
| 245 | 171058-21-2  | 1-Methyl-3-tetradecylimidazolium chloride                                                          | -0,92 |

---

**S6: Ranking of the 232 AChE variables according to decreasing values**

|    | CAS no.      | Name                                                                                                          | Acetylcholinesterase inhibition |
|----|--------------|---------------------------------------------------------------------------------------------------------------|---------------------------------|
|    |              |                                                                                                               | log(EC50)                       |
| 1  | 713512-19-7  | 1-Hexyl-3-methylimidazolium trifluorotris(pentafluoroethyl)phosphate                                          | 2,79                            |
| 2  | 851856-47-8  | 1-Butyl-1-methylpyrrolidinium trifluorotris(pentafluoroethyl)phosphate                                        | 2,77                            |
| 3  | 663628-48-6  | 4-(2-Ethoxyethyl)-4-methylmorpholinium 1,1,1-trifluoro-N-[(trifluoromethyl)sulfonyl]methanesulfonamide        | 2,66                            |
| 4  | 1049751-91-8 | 4-(3-Methoxypropyl)-4-methylmorpholinium 1,1,1-trifluoro-N-[(trifluoromethyl)sulfonyl]methanesulfonamide      | 2,66                            |
| 5  | 1107545-20-9 | 1-(2-Ethoxy-2-oxoethyl)-1-methylpyrrolidinium 1,1,1-trifluoro-N-[(trifluoromethyl)sulfonyl]methanesulfonamide | 2,66                            |
| 6  | 1026019-24-8 | 4-(3-Hydroxypropyl)-4-methylmorpholinium 1,1,1-trifluoro-N-[(trifluoromethyl)sulfonyl]methanesulfonamide      | 2,64                            |
| 7  | 1040381-03-0 | 4-(Cyanomethyl)-4-methylmorpholinium 1,1,1-trifluoro-N-[(trifluoromethyl)sulfonyl]methanesulfonamide          | 2,62                            |
| 8  | 868742-24-9  | 4-(2-Hydroxyethyl)-4-methylmorpholinium 1,1,1-trifluoro-N-[(trifluoromethyl)sulfonyl]methanesulfonamide       | 2,56                            |
| 9  | 941580-56-9  | 1-(3-Sulfopropyl)pyridinium trifluoromethanesulfonate                                                         | 2,55                            |
| 10 | 796039-07-1  | 4-(2-Methoxyethyl)-4-methylmorpholinium 1,1,1-trifluoro-N-[(trifluoromethyl)sulfonyl]methanesulfonamide       | 2,54                            |
| 11 | 1049751-90-7 | 4-(Ethoxymethyl)-4-methylmorpholinium 1,1,1-trifluoro-N-[(trifluoromethyl)sulfonyl]methanesulfonamide         | 2,53                            |
| 12 | 174899-86-6  | 1-(2-Hydroxyethyl)-3-methylimidazolium 1,1,1-trifluoro-N-[(trifluoromethyl)sulfonyl]methanesulfonamide        | 2,49                            |
| 13 | 952429-64-0  | 1-(7-Carboxyheptyl)-3-methylimidazolium bromide                                                               | 2,48                            |
| 14 | 937720-90-6  | 1-(Cyanomethyl)-3-methylimidazolium 1,1,1-trifluoro-N-[(trifluoromethyl)sulfonyl]methanesulfonamide           | 2,48                            |
| 15 | 1017553-47-7 | 1-(Cyanomethyl)-1-methylpyrrolidinium 1,1,1-trifluoro-N-[(trifluoromethyl)sulfonyl]methanesulfonamide         | 2,44                            |
| 16 | 313475-50-2  | 1-Methyl-3-(3,3,4,4,5,5,6,6,7,7,8,8,8-tridecafluorooctyl)imidazolium hexafluorophosphate                      | 2,42                            |
| 17 | 324574-95-0  | 4-Butyl-4-methylmorpholinium 1,1,1-trifluoro-N-[(trifluoromethyl)sulfonyl]methanesulfonamide                  | 2,42                            |
| 18 | 1012794-09-0 | 4-(2-Ethoxyethyl)-4-methylmorpholinium bromide                                                                | 2,40                            |
| 19 | 1332694-08-2 | 1-(3-Hydroxypropyl)-1-methylpyrrolidinium 1,1,1-trifluoro-N-[(trifluoromethyl)sulfonyl]methanesulfonamide     | 2,40                            |
| 20 | 53875-78-8   | 4-(2-Hydroxyethyl)-4-methylmorpholinium iodide                                                                | 2,40                            |
| 21 | 1012794-00-1 | 1-(2-Hydroxyethyl)-3-methylimidazolium iodide                                                                 | 2,37                            |
| 22 | 827027-30-5  | 1-(3-Hydroxypropyl)-3-methylimidazolium 1,1,1-trifluoro-N-[(trifluoromethyl)sulfonyl]methanesulfonamide       | 2,36                            |
| 23 | 1373334-04-3 | 1-(3-Methoxypropyl)-1-methylpyrrolidinium 1,1,1-trifluoro-N-[(trifluoromethyl)sulfonyl]methanesulfonamide     | 2,35                            |
| 24 | 1012794-12-5 | 4-(3-Methoxypropyl)-4-methylmorpholinium chloride                                                             | 2,32                            |
| 25 | 805228-35-7  | 3-(3-Carboxypropyl)-1-methylimidazolium chloride                                                              | 2,31                            |
| 26 | 1012794-11-4 | 4-(3-Hydroxypropyl)-4-methylmorpholinium chloride                                                             | 2,29                            |
| 27 | 943229-71-8  | 1-Hexyl-3-methylimidazolium trifluorotris(heptafluoropropyl)phosphate                                         | 2,28                            |
| 28 | 1012794-10-3 | 4-(2-Methoxyethyl)-4-methylmorpholinium chloride                                                              | 2,28                            |
| 29 | 752260-02-9  | 1-(2-Hydroxyethyl)pyridinium 1,1,1-trifluoro-N-[(trifluoromethyl)sulfonyl]methanesulfonamide                  | 2,26                            |
| 30 | 380497-19-8  | 1-Hexyl-1-methylpyrrolidinium 1,1,1-trifluoro-N-[(trifluoromethyl)sulfonyl]methanesulfonamide                 | 2,26                            |
| 31 | 1012794-15-8 | 4-(Ethoxymethyl)-4-methylmorpholinium chloride                                                                | 2,26                            |
| 32 | 1012794-13-6 | 4-(Cyanomethyl)-4-methylmorpholinium chloride                                                                 | 2,25                            |
| 33 | 355011-34-6  | 1-(3-Hydroxypropyl)-3-methylimidazolium chloride                                                              | 2,23                            |
| 34 | 151200-14-5  | 1-Methylimidazolium hydrogen tetrafluoroborate                                                                | 2,23                            |

|    |              |                                                                                                          |      |
|----|--------------|----------------------------------------------------------------------------------------------------------|------|
| 35 | 1015254-36-0 | 1-(3-Methoxypropyl)-3-methylimidazolium 1,1,1-trifluoro-N-[(trifluoromethyl)sulfonyl]methanesulfonamide  | 2,22 |
| 36 | 757212-04-7  | 1-(2-Hydroxyethyl)-1-methylpyrrolidinium 1,1,1-trifluoro-N-[(trifluoromethyl)sulfonyl]methanesulfonamide | 2,22 |
| 37 | 663628-45-3  | 1-(2-Ethoxyethyl)-1-methylpiperidinium 1,1,1-trifluoro-N-[(trifluoromethyl)sulfonyl]methanesulfonamide   | 2,21 |
| 38 | 1049751-96-3 | 1-(3-Hydroxypropyl)-1-methylpiperidinium 1,1,1-trifluoro-N-[(trifluoromethyl)sulfonyl]methanesulfonamide | 2,20 |
| 39 | 663628-46-4  | 1-(2-Ethoxyethyl)-1-methylpyrrolidinium 1,1,1-trifluoro-N-[(trifluoromethyl)sulfonyl]methanesulfonamide  | 2,20 |
| 40 | 827027-29-2  | 1-(3-Hydroxypropyl)pyridinium 1,1,1-trifluoro-N-[(trifluoromethyl)sulfonyl]methanesulfonamide            | 2,18 |
| 41 | 1196206-01-5 | 1-Hexyl-3-methylimidazolium tris[(trifluoromethyl)sulfonyl]methide (1:1)                                 | 2,16 |
| 42 | 952429-67-3  | 1-Methyl-3-(3-oxobutyl)imidazolium bromide                                                               | 2,16 |
| 43 | 878005-11-9  | 1-Ethyl-3-methylimidazolium trifluorotris(pentafluoroethyl)phosphate                                     | 2,14 |
| 44 | 941584-15-2  | 1-(3-Hydroxypropyl)-1-methylpyrrolidinium chloride                                                       | 2,12 |
| 45 | 1017553-46-6 | 1-(Cyanomethyl)pyridinium 1,1,1-trifluoro-N-[(trifluoromethyl)sulfonyl]methanesulfonamide                | 2,11 |
| 46 | 178631-01-1  | 1-(2-Methoxyethyl)-3-methylimidazolium 1,1,1-trifluoro-N-[(trifluoromethyl)sulfonyl]methanesulfonamide   | 2,10 |
| 47 | 69095-13-2   | 1-(2-Hydroxyethyl)pyridinium iodide                                                                      | 2,09 |
| 48 | 194986-69-1  | 1-(Cyanomethyl)-1-methylpyrrolidinium chloride                                                           | 2,09 |
| 49 | 154312-63-7  | 1-(Cyanomethyl)-3-methylimidazolium chloride                                                             | 2,09 |
| 50 | 75174-77-5   | 4-Butyl-4-methylmorpholinium bromide                                                                     | 2,09 |
| 51 | 945996-13-4  | 1-(Ethoxymethyl)-3-methylimidazolium 1,1,1-trifluoro-N-[(trifluoromethyl)sulfonyl]methanesulfonamide     | 2,07 |
| 52 | 1309983-34-3 | 1-(Cyanomethyl)-1-methylpiperidinium 1,1,1-trifluoro-N-[(trifluoromethyl)sulfonyl]methanesulfonamide     | 2,07 |
| 53 | 445497-25-6  | 4-Ethyl-4-methylmorpholinium 4-methylbenzenesulfonate                                                    | 2,06 |
| 54 | 628-13-7     | Pyridine hydrochloride                                                                                   | 2,06 |
| 55 | 54770-67-1   | 1-(2-Hydroxyethyl)-1-methylpyrrolidinium iodide                                                          | 2,04 |
| 56 | 1012794-05-6 | 1-(3-Methoxypropyl)-1-methylpyrrolidinium chloride                                                       | 2,03 |
| 57 | 663628-44-2  | 1-(2-Ethoxyethyl)-1-methylpiperidinium bromide                                                           | 2,00 |
| 58 | 864665-30-5  | 1-(4-Hydroxybutyl)-3-methylimidazolium chloride                                                          | 1,98 |
| 59 | 833446-39-2  | 1-(2-Ethoxyethyl)-1-methylpyrrolidinium bromide                                                          | 1,98 |
| 60 | 757212-03-6  | 1-(2-Hydroxyethyl)-1-methylpiperidinium 1,1,1-trifluoro-N-[(trifluoromethyl)sulfonyl]methanesulfonamide  | 1,96 |
| 61 | 385384-39-4  | 1-Butyl-3-methylimidazolium (T-4)-tetracarbonylcobaltate                                                 | 1,93 |
| 62 | 1049751-95-2 | 1-(3-Methoxypropyl)-1-methylpiperidinium 1,1,1-trifluoro-N-[(trifluoromethyl)sulfonyl]methanesulfonamide | 1,92 |
| 63 | 1012794-06-7 | 1-(3-Methoxypropyl)-3-methylimidazolium chloride                                                         | 1,89 |
| 64 | 187863-16-7  | 1-(3-Hydroxypropyl)pyridinium chloride                                                                   | 1,89 |
| 65 | 945996-02-1  | 1-(Ethoxymethyl)-3-methylimidazolium chloride                                                            | 1,86 |
| 66 | 1373334-02-1 | 1-(Ethoxymethyl)-1-methylpyrrolidinium 1,1,1-trifluoro-N-[(trifluoromethyl)sulfonyl]methanesulfonamide   | 1,85 |
| 67 | 666823-18-3  | 1-Ethyl-3-methylimidazolium, salt with methanetricarbonitrile (1:1)                                      | 1,84 |
| 68 | 474972-46-8  | 1-(2-Methoxyethyl)-3-methylimidazolium chloride                                                          | 1,83 |
| 69 | 1334291-67-6 | 1-(3-Hydroxypropyl)-1-methylpiperidinium chloride                                                        | 1,82 |
| 70 | 1104525-90-7 | 1-Propylpyridinium 1,1,1-trifluoro-N-[(trifluoromethyl)sulfonyl]methanesulfonamide                       | 1,82 |
| 71 | 382150-50-7  | 1-Hexyl-3-methylimidazolium 1,1,1-trifluoro-N-[(trifluoromethyl)sulfonyl]methanesulfonamide              | 1,80 |
| 72 | 1049751-93-0 | 1-(Ethoxymethyl)-1-methylpiperidinium 1,1,1-trifluoro-N-[(trifluoromethyl)sulfonyl]methanesulfonamide    | 1,80 |
| 73 | 909398-59-0  | 1-Hexyl-1-methylpyrrolidinium chloride                                                                   | 1,79 |
| 74 | 370865-89-7  | 1-Ethyl-3-methylimidazolium N-cyanocyanamide                                                             | 1,79 |



|     |                   |                                                                                                          |      |
|-----|-------------------|----------------------------------------------------------------------------------------------------------|------|
| 75  | 67889-35-4        | 1-(2-Hydroxyethyl)-1-methylpiperidinium iodide                                                           | 1,78 |
| 76  | 778593-17-2       | 1-(2-Ethoxyethyl)-3-methylimidazolium 1,1,1-trifluoro-N-[(trifluoromethyl)sulfonyl]methanesulfonamide    | 1,76 |
| 77  | 1049751-98-5      | 1-(Ethoxymethyl)pyridinium 1,1,1-trifluoro-N-[(trifluoromethyl)sulfonyl]methanesulfonamide               | 1,76 |
| 78  | 223437-11-4       | 1-Butyl-1-methylpyrrolidinium 1,1,1-trifluoro-N-[(trifluoromethyl)sulfonyl]methanesulfonamide            | 1,75 |
| 79  | 757240-24-7       | 1-(2-Methoxyethyl)-1-methylpyrrolidinium 1,1,1-trifluoro-N-[(trifluoromethyl)sulfonyl]methanesulfonamide | 1,73 |
| 80  | 909398-60-3       | 1-Methyl-1-octylpyrrolidinium chloride                                                                   | 1,73 |
| 81  | 178631-04-4       | 1-Methyl-3-octylimidazolium 1,1,1-trifluoro-N-[(trifluoromethyl)sulfonyl]methanesulfonamide              | 1,71 |
| 82  | 863663-01-8       | 1-(2-Methoxyethyl)pyridinium 1,1,1-trifluoro-N-[(trifluoromethyl)sulfonyl]methanesulfonamide             | 1,71 |
| 83  | 852616-00-3       | 1-Ethyl-3-methylimidazolium bis(pentafluoroethyl)phosphinate                                             | 1,71 |
| 84  | 1049752-00-2      | 1-(3-Methoxypropyl)pyridinium 1,1,1-trifluoro-N-[(trifluoromethyl)sulfonyl]methanesulfonamide            | 1,70 |
| 85  | 328090-25-1       | 1-Ethyl-3-methylimidazolium 4-methylbenzenesulfonate                                                     | 1,67 |
| 86  | 194986-67-9       | 1-(Cyanomethyl)-1-methylpiperidinium chloride                                                            | 1,67 |
| 87  | 17281-59-3        | 1-(Cyanomethyl)pyridinium chloride                                                                       | 1,66 |
| 88  | 216300-12-8       | 1-Methyl-3-propylimidazolium hexafluorophosphate                                                         | 1,66 |
| 89  | 1012793-99-5      | 1-(2-Ethoxyethyl)-3-methylimidazolium bromide                                                            | 1,64 |
| 90  | 174899-82-2       | 1-Ethyl-3-methylimidazolium 1,1,1-trifluoro-N-[(trifluoromethyl)sulfonyl]methanesulfonamide              | 1,63 |
| 91  | 1012794-01-2      | 1-(2-Methoxyethyl)-1-methylpyrrolidinium chloride                                                        | 1,63 |
| 92  | 376650-04-3       | 1-Ethyl-3-methylimidazolium bis[1,2-benzenediolato-O1,O2]borate                                          | 1,62 |
| 93  | 244193-48-4       | 1-Methyl-3-propylimidazolium tetrafluoroborate                                                           | 1,62 |
| 94  | none (2013-09-19) | 1-Butyl-3-methylimidazolium hexafluorophosphate                                                          | 1,60 |
| 95  | 174899-83-3       | 1-Butyl-3-methylimidazolium 1,1,1-trifluoro-N-[(trifluoromethyl)sulfonyl]methanesulfonamide              | 1,59 |
| 96  | 790663-77-3       | 1-Ethyl-3-methylimidazolium 2-(2-methoxyethoxy)ethyl sulfate                                             | 1,57 |
| 97  | 873583-83-6       | 1-(2-Methoxyethyl)-1-methylpiperidinium 1,1,1-trifluoro-N-[(trifluoromethyl)sulfonyl]methanesulfonamide  | 1,57 |
| 98  | 304680-36-2       | 1-Methyl-3-octylimidazolium hexafluorophosphate                                                          | 1,56 |
| 99  | 637348-59-5       | 1-Ethyl-3-propylimidazolium bromide                                                                      | 1,55 |
| 100 | 145022-44-2       | 1-Ethyl-3-methylimidazolium trifluoromethanesulfonate                                                    | 1,55 |
| 101 | 244193-51-9       | 1-Heptyl-3-methylimidazolium tetrafluoroborate                                                           | 1,55 |
| 102 | 359845-21-9       | 1-Butyl-3-methylimidazolium tetrachloroferrate                                                           | 1,54 |
| 103 | 445473-58-5       | 1-Butyl-3-methylimidazolium octylsulfate                                                                 | 1,52 |
| 104 | 873-71-2          | 1-Propylpyridinium bromide                                                                               | 1,52 |
| 105 | 595565-54-1       | 1-Butyl-3-methylimidazolium 2-(2-methoxyethoxy)ethyl sulfate                                             | 1,52 |
| 106 | 847335-66-4       | 1-Methyl-3-(phenylmethyl)imidazolium tetrafluoroborate                                                   | 1,52 |
| 107 | 1012794-04-5      | 1-(3-Methoxypropyl)-1-methylpiperidinium chloride                                                        | 1,52 |
| 108 | 697248-62-7       | 1-Hexyl-3-methylimidazolium, salt with 1,2-benzisothiazol-3(2H)-one 1,1-dioxide (1:1)                    | 1,50 |
| 109 | 460983-97-5       | 1-Hexylpyridinium 1,1,1-trifluoro-N-[(trifluoromethyl)sulfonyl]methanesulfonamide                        | 1,50 |
| 110 | 65039-10-3        | 1-Methyl-3-(2-propenyl)imidazolium chloride                                                              | 1,50 |
| 111 | 145022-48-6       | 1-Butyl-3-ethylimidazolium trifluoromethanesulfonate                                                     | 1,49 |
| 112 | 410522-18-8       | 1-Butyl-3-methylimidazolium 4-methylbenzenesulfonate                                                     | 1,49 |
| 113 | 376650-06-5       | 1-Ethyl-3-methylimidazolium bis[ethanedioato-O1,O2]borate                                                | 1,48 |
| 114 | 79917-89-8        | 1-Methyl-3-propylimidazolium chloride                                                                    | 1,47 |

|     |              |                                                                                              |      |
|-----|--------------|----------------------------------------------------------------------------------------------|------|
| 115 | 952429-74-2  | 1-Methyl-1-octylpyrrolidinium tetrafluoroborate                                              | 1,47 |
| 116 | 412009-61-1  | 1-Ethyl-3-methylimidazolium hydrogen sulfate                                                 | 1,45 |
| 117 | 342573-75-5  | 1-Ethyl-3-methylimidazolium ethyl sulfate                                                    | 1,44 |
| 118 | 65039-05-6   | 1-Butyl-3-methylimidazolium iodide                                                           | 1,44 |
| 119 | 174899-96-8  | 1-Butyl-3-ethylimidazolium trifluoroacetate                                                  | 1,44 |
| 120 | 886439-37-8  | 1-(2-Methoxyethyl)-1-methylpiperidinium bromide                                              | 1,43 |
| 121 | 1012794-08-9 | 1-(Ethoxymethyl)-1-methylpiperidinium chloride                                               | 1,43 |
| 122 | 623580-02-9  | 1-Butyl-1-methylpiperidinium 1,1,1-trifluoro-N-[(trifluoromethyl)sulfonyl]methanesulfonamide | 1,42 |
| 123 | 581101-91-9  | 1-Butyl-3-ethylimidazolium tetrafluoroborate                                                 | 1,42 |
| 124 | 357915-04-9  | 1-Heptyl-3-methylimidazolium hexafluorophosphate                                             | 1,42 |
| 125 | 1012794-07-8 | 1-(3-Methoxypropyl)pyridinium chloride                                                       | 1,42 |
| 126 | 433337-12-3  | 1-Methyl-3-(2-phenylethyl)imidazolium hexafluorophosphate                                    | 1,42 |
| 127 | 883860-38-6  | 1-Butyl-4-methylpyridinium trifluorotris(pentafluoroethyl)phosphate                          | 1,41 |
| 128 | 845835-00-9  | 1-Methyl-3-(2-phenylethyl)imidazolium tetrafluoroborate                                      | 1,41 |
| 129 | 581101-92-0  | 1-Heptyl-3-methylimidazolium chloride                                                        | 1,41 |
| 130 | 500996-04-3  | 1-Methyl-3-(phenylmethyl)imidazolium tetrafluoroborate                                       | 1,40 |
| 131 | 174899-66-2  | 1-Butyl-3-methylimidazolium trifluoromethanesulfonate                                        | 1,39 |
| 132 | 54304-66-4   | 1,3-Diethylimidazolium bromide                                                               | 1,39 |
| 133 | 174645-81-9  | 1-Butyl-3-methylimidazolium (OC-6-11)-hexafluoroantimonate                                   | 1,38 |
| 134 | 174899-65-1  | 1-Ethyl-3-methylimidazolium trifluoroacetate                                                 | 1,38 |
| 135 | 790663-79-5  | 1-Ethyl-3-methylimidazolium octylsulfate                                                     | 1,37 |
| 136 | 304680-35-1  | 1-Hexyl-3-methylimidazolium hexafluorophosphate                                              | 1,37 |
| 137 | 36443-80-8   | 1-Methyl-3-(phenylmethyl)imidazolium chloride                                                | 1,36 |
| 138 | 342789-81-5  | 1-Butyl-3-methylimidazolium methanesulfonate                                                 | 1,36 |
| 139 | 331717-63-6  | 1-Ethyl-3-methylimidazolium thiocyanate                                                      | 1,35 |
| 140 | 401788-98-5  | 1-Butyl-3-methylimidazolium methyl sulfate                                                   | 1,35 |
| 141 | 262297-13-2  | 1-Butyl-3-methylimidazolium hydrogen sulfate                                                 | 1,34 |
| 142 | 143314-16-3  | 1-Ethyl-3-methylimidazolium tetrafluoroborate                                                | 1,34 |
| 143 | 174501-65-6  | 1-Butyl-3-methylimidazolium tetrafluoroborate                                                | 1,34 |
| 144 | 742099-80-5  | 1-Ethyl-3-methylimidazolium tetracyanoborate                                                 | 1,33 |
| 145 | 623167-81-7  | 1-Hexylpyridinium trifluoromethanesulfonate                                                  | 1,33 |
| 146 | 390423-43-5  | 1-Butylpyridinium trifluoromethanesulfonate                                                  | 1,33 |
| 147 | 280779-52-4  | 1-Methyl-3-pentylimidazolium hexafluorophosphate                                             | 1,32 |
| 148 | 1739-84-0    | 1,2-Dimethylimidazolium                                                                      | 1,32 |
| 149 | 209679-88-9  | 1-(2-Methoxyethyl)pyridinium chloride                                                        | 1,31 |
| 150 | 67226-45-3   | 1-Butylpyridinium $\mu$ -chlorohexachlorodialuminate                                         | 1,31 |
| 151 | 21379-36-2   | 1-(Ethoxymethyl)pyridinium chloride                                                          | 1,30 |
| 152 | 85100-77-2   | 1-Butyl-3-methylimidazolium bromide                                                          | 1,30 |
| 153 | 370865-80-8  | 1-Butyl-1-methylpyrrolidinium N-cyanocyanamide                                               | 1,29 |
| 154 | 344790-87-0  | 1-Butyl-3-methylimidazolium thiocyanate                                                      | 1,29 |

|     |             |                                                                                             |      |
|-----|-------------|---------------------------------------------------------------------------------------------|------|
| 155 | 186088-50-6 | 1-Butylpyridinium hexafluorophosphate                                                       | 1,29 |
| 156 | 244193-50-8 | 1-Hexyl-3-methylimidazolium tetrafluoroborate                                               | 1,28 |
| 157 | 93457-69-3  | 1-Butyl-1-methylpyrrolidinium bromide                                                       | 1,28 |
| 158 | 393550-29-3 | 1-Ethyl-3-hexylimidazolium tetrafluoroborate                                                | 1,27 |
| 159 | 345984-11-4 | 1-Butyl-1-methylpyrrolidinium tetrafluoroborate                                             | 1,26 |
| 160 | 187332-85-0 | 1-Methyl-3-(2-phenylethyl)imidazolium chloride                                              | 1,26 |
| 161 | 2294-38-4   | 1-Ethylpyridinium chloride                                                                  | 1,26 |
| 162 | 362043-46-7 | 1-Decyl-3-methylimidazolium hexafluorophosphate                                             | 1,25 |
| 163 | 797789-00-5 | 1-Hexylpyridinium hexafluorophosphate                                                       | 1,25 |
| 164 | 65039-09-0  | 1-Ethyl-3-methylimidazolium chloride                                                        | 1,25 |
| 165 | 433337-11-2 | 1-Methyl-3-(phenylmethyl)imidazolium hexafluorophosphate                                    | 1,24 |
| 166 | 448245-52-1 | 1-Butyl-3-methylimidazolium N-cyanocyanamide                                                | 1,24 |
| 167 | 244193-49-5 | 1-Methyl-3-pentylimidazolium tetrafluoroborate                                              | 1,24 |
| 168 | 171058-22-3 | 1-Methyl-3-pentylimidazolium chloride                                                       | 1,24 |
| 169 | 171058-17-6 | 1-Hexyl-3-methylimidazolium chloride                                                        | 1,22 |
| 170 | 637348-60-8 | 1-Methyl-3-[(4-methylphenyl)methyl]imidazolium chloride                                     | 1,20 |
| 171 | 94280-72-5  | 1-Butyl-1-methylpiperidinium bromide                                                        | 1,20 |
| 172 | 547719-00-6 | 1-Ethyl-3-hexylimidazolium bromide                                                          | 1,18 |
| 173 | 890532-45-3 | 1-Pentylpyridinium 1,1,1-trifluoro-N-[(trifluoromethyl)sulfonyl]methanesulfonamide          | 1,18 |
| 174 | 343952-29-4 | 1-Methyl-3-nonylimidazolium hexafluorophosphate                                             | 1,17 |
| 175 | 479500-35-1 | 1-Butyl-1-methylpyrrolidinium chloride                                                      | 1,17 |
| 176 | 79917-90-1  | 1-Butyl-3-methylimidazolium chloride                                                        | 1,16 |
| 177 | 885456-20-2 | 1-Butylpyridinium methyl sulfate                                                            | 1,15 |
| 178 | 203389-28-0 | 1-Butylpyridinium tetrafluoroborate                                                         | 1,15 |
| 179 | 849418-12-8 | 1-(2-Ethoxyethyl)pyridinium 1,1,1-trifluoro-N-[(trifluoromethyl)sulfonyl]methanesulfonamide | 1,12 |
| 180 | 151263-00-2 | 1-(Ethoxymethyl)-1-methylpyrrolidinium chloride                                             | 1,11 |
| 181 | 874-80-6    | 1-Butylpyridinium bromide                                                                   | 1,10 |
| 182 | 384347-06-2 | 1-Octylpyridinium 1,1,1-trifluoro-N-[(trifluoromethyl)sulfonyl]methanesulfonamide           | 1,08 |
| 183 | 710336-91-7 | 1-Butyl-3-methylimidazolium 1,1,1-trifluoro-N-(trifluoromethyl)methanaminat                 | 1,07 |
| 184 | 6220-15-1   | 1-Hexylpyridinium chloride                                                                  | 1,02 |
| 185 | 817575-02-3 | 3-Methyl-1-octylimidazolium octylsulfate                                                    | 0,98 |
| 186 | 244193-52-0 | 1-Methyl-3-octylimidazolium tetrafluoroborate                                               | 0,98 |
| 187 | 64697-40-1  | 1-Methyl-3-octylimidazolium chloride                                                        | 0,96 |
| 188 | 4086-73-1   | 1-Octylpyridinium chloride                                                                  | 0,96 |
| 189 | 1124-64-7   | 1-Butylpyridinium chloride                                                                  | 0,93 |
| 190 | 343952-33-0 | 1-Butyl-4-methylpyridinium tetrafluoroborate                                                | 0,92 |
| 191 | 108153-25-9 | 1-(2-Ethoxyethyl)pyridinium bromide                                                         | 0,92 |
| 192 | 244193-55-3 | 1-Methyl-3-nonylimidazolium tetrafluoroborate                                               | 0,90 |
| 193 | 952429-73-1 | 1-Hexyl-4-methylpyridinium tetrafluoroborate                                                | 0,90 |
| 194 | 401788-99-6 | 1-Butyl-4-methylpyridinium hexafluorophosphate                                              | 0,90 |

|     |              |                                                                                                     |       |
|-----|--------------|-----------------------------------------------------------------------------------------------------|-------|
| 195 | 742099-83-8  | 1-Butyl-4-methylpyridinium tetracyanoborate                                                         | 0,88  |
| 196 | 53385-72-1   | 1-Pentylpyridinium bromide                                                                          | 0,88  |
| 197 | 62409-49-8   | 1-Hexyl-4-methylpyridinium chloride                                                                 | 0,77  |
| 198 | 171058-20-1  | 1-Methyl-3-nonylimidazolium chloride                                                                | 0,75  |
| 199 | 952429-65-1  | 1-(8-Hydroxyoctyl)-3-methylimidazolium bromide                                                      | 0,74  |
| 200 | 845835-03-2  | 1-Butyl-3-methylpyridinium hexafluorophosphate                                                      | 0,71  |
| 201 | 112400-86-9  | 1-Butyl-4-methylpyridinium chloride                                                                 | 0,71  |
| 202 | 384347-21-1  | 1-Hexyl-2,3-dimethylimidazolium tetrafluoroborate                                                   | 0,69  |
| 203 | 936239-96-2  | 4-Methyl-1-octylpyridinium tetrafluoroborate                                                        | 0,69  |
| 204 | 597581-48-1  | 1-Butyl-3-methylpyridinium tetrafluoroborate                                                        | 0,64  |
| 205 | 244193-56-4  | 1-Decyl-3-methylimidazolium tetrafluoroborate                                                       | 0,58  |
| 206 | 952429-72-0  | 1-Butyl-3,5-dimethylpyridinium tetrafluoroborate                                                    | 0,56  |
| 207 | 900797-77-5  | 4-(Dimethylamino)-1-ethylpyridinium 1,1,1-trifluoro-N-[(trifluoromethyl)sulfonyl]methanesulfonamide | 0,56  |
| 208 | 712355-12-9  | 1-Butyl-3-methylpyridinium N-cyanocyanamide                                                         | 0,55  |
| 209 | 171058-19-8  | 1-Methyl-3-octadecylimidazolium chloride                                                            | 0,53  |
| 210 | 171058-18-7  | 1-Decyl-3-methylimidazolium chloride                                                                | 0,50  |
| 211 | 952429-71-9  | 1-Butyl-3,4-dimethylpyridinium tetrafluoroborate                                                    | 0,50  |
| 212 | 872672-57-6  | 4-(Dimethylamino)-1-hexylpyridinium 1,1,1-trifluoro-N-[(trifluoromethyl)sulfonyl]methanesulfonamide | 0,50  |
| 213 | 141645-91-2  | 4-Methyl-1-octylpyridinium chloride                                                                 | 0,50  |
| 214 | 581101-93-1  | 1-Decyl-3-ethylimidazolium bromide                                                                  | 0,42  |
| 215 | 125652-55-3  | 1-Butyl-3-methylpyridinium chloride                                                                 | 0,42  |
| 216 | 916730-40-0  | 1-Hexyl-3-methylpyridinium chloride                                                                 | 0,39  |
| 217 | 114203-57-5  | 4-(Dimethylamino)-1-ethylpyridinium bromide                                                         | 0,36  |
| 218 | 916730-31-9  | 1-Butyl-3,5-dimethylpyridinium chloride                                                             | 0,29  |
| 219 | 900797-79-7  | 1-Butyl-4-(dimethylamino)pyridinium 1,1,1-trifluoro-N-[(trifluoromethyl)sulfonyl]methanesulfonamide | 0,25  |
| 220 | 61546-01-8   | 1-Hexadecyl-3-methylimidazolium chloride                                                            | 0,22  |
| 221 | 31537-79-8   | 1-Butylquinolinium bromide                                                                          | 0,22  |
| 222 | 286453-46-1  | 1-Butyl-2-methylpyridinium tetrafluoroborate                                                        | 0,20  |
| 223 | 916730-30-8  | 1-Butyl-3,4-dimethylpyridinium chloride                                                             | 0,15  |
| 224 | 952429-68-4  | 1-Butylquinolinium tetrafluoroborate                                                                | 0,05  |
| 225 | 171058-21-2  | 1-Methyl-3-tetradecylimidazolium chloride                                                           | 0,04  |
| 226 | 864461-36-9  | 3-Methyl-1-octylpyridinium chloride                                                                 | 0,02  |
| 227 | 112400-85-8  | 1-Butyl-2-methylpyridinium chloride                                                                 | -0,03 |
| 228 | 952429-69-5  | 1-Hexylquinolinium tetrafluoroborate                                                                | -0,04 |
| 229 | 82522-15-4   | 1-Butyl-4-(dimethylamino)pyridinium chloride                                                        | -0,07 |
| 230 | 1012794-14-7 | 4-(Dimethylamino)-1-hexylpyridinium chloride                                                        | -0,12 |
| 231 | 952429-70-8  | 1-Octylquinolinium tetrafluoroborate                                                                | -0,18 |
| 232 | 14848-21-6   | 1-Octylquinolinium bromide                                                                          | -0,20 |

S7: The 87 ILs in Bacteria and Fungi toxicity model

|    | CAS no.           | Name                                                       |
|----|-------------------|------------------------------------------------------------|
| 1  | 615538-92-6       | 1-Methylimidazolium 2-hydroxypropanoate                    |
| 2  | 1010075-76-9      | 1-Methylimidazolium (2S)-2-hydroxypropanoate               |
| 3  | 615539-01-0       | 1-Decylimidazolium 2-hydroxypropanoate                     |
| 4  | 898223-27-3       | 1-Decylimidazolium (2S)-2-hydroxypropanoate                |
| 5  | 615539-02-1       | 1-Undecylimidazolium 2-hydroxypropanoate                   |
| 6  | 885224-27-1       | 1-Undecylimidazolium (2S)-2-hydroxypropanoate              |
| 7  | 615539-03-2       | 1-Dodecylimidazolium 2-hydroxypropanoate                   |
| 8  | 898558-89-9       | 1-Dodecylimidazolium (2S)-2-hydroxypropanoate              |
| 9  | 615539-10-1       | 1-[(Decyloxy)methyl]imidazolium 2-hydroxypropanoate        |
| 10 | 885224-30-6       | 1-[(Decyloxy)methyl]imidazolium (2S)-2-hydroxypropanoate   |
| 11 | 615539-11-2       | 1-[(Undecyloxy)methyl]imidazolium 2-hydroxypropanoate      |
| 12 | none (2013-09-19) | 1-[(Undecyloxy)methyl]imidazolium (2S)-2-hydroxypropanoate |
| 13 | 615539-12-3       | 1-[(Dodecyloxy)methyl]imidazolium 2-hydroxypropanoate      |
| 14 | 898558-92-4       | 1-[(Dodecyloxy)methyl]imidazolium (2S)-2-hydroxypropanoate |
| 15 | 615539-04-3       | 1-(Butoxymethyl)imidazolium 2-hydroxypropanoate            |
| 16 | 885224-28-2       | 1-(Butoxymethyl)imidazolium (2S)-2-hydroxypropanoate       |
| 17 | 615539-05-4       | 1-[(Pentyloxy)methyl]imidazolium 2-hydroxypropanoate       |
| 18 | none (2013-09-19) | 1-[(Pentyloxy)methyl]imidazolium (2S)-2-hydroxypropanoate  |
| 19 | 615539-06-5       | 1-[(Hexyloxy)methyl]imidazolium 2-hydroxypropanoate        |
| 20 | 885224-29-3       | 1-[(Hexyloxy)methyl]imidazolium (2S)-2-hydroxypropanoate   |
| 21 | 615539-07-6       | 1-[(Heptyloxy)methyl]imidazolium 2-hydroxypropanoate       |
| 22 | none (2013-09-19) | 1-[(Heptyloxy)methyl]imidazolium (2S)-2-hydroxypropanoate  |
| 23 | 615539-08-7       | 1-[(Octyloxy)methyl]imidazolium 2-hydroxypropanoate        |
| 24 | 898558-90-2       | 1-[(Octyloxy)methyl]imidazolium (2S)-2-hydroxypropanoate   |
| 25 | 615539-09-8       | 1-[(Nonyloxy)methyl]imidazolium 2-hydroxypropanoate        |
| 26 | 898558-91-3       | 1-[(Nonyloxy)methyl]imidazolium (2S)-2-hydroxypropanoate   |
| 27 | 615538-93-7       | 1-Ethylimidazolium 2-hydroxypropanoate                     |
| 28 | none (2013-09-19) | 1-Ethylimidazolium (2S)-2-hydroxypropanoate                |
| 29 | 615538-94-8       | 1-Propylimidazolium 2-hydroxypropanoate                    |
| 30 | none (2013-09-19) | 1-Propylimidazolium (2S)-2-hydroxypropanoate               |
| 31 | 885224-25-9       | 1-Butylimidazolium (2S)-2-hydroxypropanoate                |
| 32 | 615538-96-0       | 1-Pentylimidazolium 2-hydroxypropanoate                    |
| 33 | none (2013-09-19) | 1-Pentylimidazolium (2S)-2-hydroxypropanoate               |
| 34 | 615538-97-1       | 1-Hexylimidazolium 2-hydroxypropanoate                     |
| 35 | 885224-26-0       | 1-Hexylimidazolium (2S)-2-hydroxypropanoate                |

|    |                   |                                                                                         |
|----|-------------------|-----------------------------------------------------------------------------------------|
| 36 | 615538-98-2       | 1-Heptylimidazolium 2-hydroxypropanoate                                                 |
| 37 | none (2013-09-19) | 1-Heptylimidazolium (2S)-2-hydroxypropanoate                                            |
| 38 | 615538-99-3       | 1-Octylimidazolium 2-hydroxypropanoate                                                  |
| 39 | 898558-87-7       | 1-Octylimidazolium (2S)-2-hydroxypropanoate                                             |
| 40 | 615539-00-9       | 1-Nonylimidazolium 2-hydroxypropanoate                                                  |
| 41 | 898558-88-8       | 1-Nonylimidazolium (2S)-2-hydroxypropanoate                                             |
| 42 | 761410-66-6       | 1,3-Bis[(decyloxy)methyl]imidazolium chloride                                           |
| 43 | 761410-67-7       | 1,3-Bis[(undecyloxy)methyl]imidazolium chloride                                         |
| 44 | 761410-68-8       | 1,3-Bis[(dodecyloxy)methyl]imidazolium chloride                                         |
| 45 | none (2013-09-19) | 1,3-Bis[(tetradecyloxy)methyl]imidazolium chloride                                      |
| 46 | none (2013-09-19) | 1,3-Bis[(hexadecyloxy)methyl]imidazolium chloride                                       |
| 47 | 126049-85-2       | 1,3-Bis(propoxymethyl)imidazolium chloride                                              |
| 48 | 761410-60-0       | 1,3-Bis(butoxymethyl)imidazolium chloride                                               |
| 49 | 761410-61-1       | 1,3-Bis[(pentyloxy)methyl]imidazolium chloride                                          |
| 50 | 761410-62-2       | 1,3-Bis[(hexyloxy)methyl]imidazolium chloride                                           |
| 51 | 761410-63-3       | 1,3-Bis[(heptyloxy)methyl]imidazolium chloride                                          |
| 52 | 761410-64-4       | 1,3-Bis[(octyloxy)methyl]imidazolium chloride                                           |
| 53 | 761410-65-5       | 1,3-Bis[(nonyloxy)methyl]imidazolium chloride                                           |
| 54 | 435346-40-0       | 3-(Aminocarbonyl)-1-[(cyclododecyloxy)methyl]pyridinium chloride                        |
| 55 | 435346-66-0       | 3-[[[(Decyloxy)methoxy]methyl]amino]carbonyl]-1-[(decyloxy)methyl]pyridinium chloride   |
| 56 | 435346-34-2       | 3-(Aminocarbonyl)-1-[(decyloxy)methyl]pyridinium chloride                               |
| 57 | 435346-58-0       | 3-(Aminocarbonyl)-1-[(decyloxy)methyl]pyridinium (T-4)-tetrachloroferrate               |
| 58 | 435346-54-6       | Bis[3-(aminocarbonyl)-1-[(decyloxy)methyl]pyridinium] (T-4)-tetrachlorocobaltate        |
| 59 | 435346-55-7       | Bis[3-(aminocarbonyl)-1-[(decyloxy)methyl]pyridinium] (T-4)-tetrachlorocuprate          |
| 60 | 435346-57-9       | Bis[3-(aminocarbonyl)-1-[(decyloxy)methyl]pyridinium] (T-4)-tetrachloromagnesate        |
| 61 | 435346-56-8       | Bis[3-(aminocarbonyl)-1-[(decyloxy)methyl]pyridinium] (T-4)-tetrachlorozincate          |
| 62 | 435346-76-2       | 4-(Aminocarbonyl)-1-[(decyloxy)methyl]pyridinium chloride                               |
| 63 | 435346-35-3       | 3-(Aminocarbonyl)-1-[(undecyloxy)methyl]pyridinium chloride                             |
| 64 | 435346-77-3       | 4-(Aminocarbonyl)-1-[(undecyloxy)methyl]pyridinium chloride                             |
| 65 | 435346-53-5       | 3-(Aminocarbonyl)-1-[(dodecyloxy)methyl]pyridinium acetate                              |
| 66 | 435346-52-4       | 3-(Aminocarbonyl)-1-[(dodecyloxy)methyl]pyridinium tetrafluoroborate                    |
| 67 | 435346-41-1       | 3-(Aminocarbonyl)-1-[(dodecyloxy)methyl]pyridinium bromide                              |
| 68 | 435346-36-4       | 3-(Aminocarbonyl)-1-[(dodecyloxy)methyl]pyridinium chloride                             |
| 69 | 435346-45-5       | 3-(Aminocarbonyl)-1-[(dodecyloxy)methyl]pyridinium perchlorate                          |
| 70 | 435346-42-2       | 3-(Aminocarbonyl)-1-[(dodecyloxy)methyl]pyridinium iodide                               |
| 71 | 435346-44-4       | 3-(Aminocarbonyl)-1-[(dodecyloxy)methyl]pyridinium nitrate                              |
| 72 | 435346-78-4       | 4-(Aminocarbonyl)-1-[(dodecyloxy)methyl]pyridinium chloride                             |
| 73 | 435346-63-7       | 3-[[[(Heptyloxy)methoxy]methyl]amino]carbonyl]-1-[(heptyloxy)methyl]pyridinium chloride |
| 74 | 435346-64-8       | 3-[[[(Octyloxy)methoxy]methyl]amino]carbonyl]-1-[(octyloxy)methyl]pyridinium chloride   |
| 75 | 435346-65-9       | 3-[[[(Nonyloxy)methoxy]methyl]amino]carbonyl]-1-[(nonyloxy)methyl]pyridinium chloride   |

|    |            |                                                      |
|----|------------|------------------------------------------------------|
| 76 | 13501-50-3 | 1-[(Decyloxy)methyl]quinolinium chloride             |
| 77 | 97166-43-3 | 1-[(Decyloxy)methyl]-6-methylquinolinium chloride    |
| 78 | 97166-47-7 | 1-[(Decyloxy)methyl]-8-hydroxyquinolinium chloride   |
| 79 | 41063-22-3 | 1-[(Dodecyloxy)methyl]quinolinium chloride           |
| 80 | 97166-44-4 | 1-[(Dodecyloxy)methyl]-6-methylquinolinium chloride  |
| 81 | 97166-48-8 | 1-[(Dodecyloxy)methyl]-8-hydroxyquinolinium chloride |
| 82 | 97166-39-7 | 1-[(Hexyloxy)methyl]quinolinium chloride             |
| 83 | 97166-41-1 | 1-[(Hexyloxy)methyl]-6-methylquinolinium chloride    |
| 84 | 97166-45-5 | 1-[(Hexyloxy)methyl]-8-hydroxyquinolinium chloride   |
| 85 | 97166-40-0 | 1-[(Octyloxy)methyl]quinolinium chloride             |
| 86 | 97166-42-2 | 6-Methyl-1-[(octyloxy)methyl]quinolinium chloride    |
| 87 | 97166-46-6 | 8-Hydroxy-1-[(octyloxy)methyl]quinolinium chloride   |

---

S8: The 26 Variables in Bacteria and Fungi toxicity model

|    | Variables                                                            | unit     |
|----|----------------------------------------------------------------------|----------|
| 1  | <i>Candida albicans</i> ATCC 10231 (growth inhibition) 48h           | log(MIC) |
| 2  | <i>Candida albicans</i> ATCC 10231 (death) 5d                        | log(MBC) |
| 3  | <i>Enterococcus hirae</i> ATCC 10541 (growth inhibition) 24h         | log(MIC) |
| 4  | <i>Enterococcus hirae</i> ATCC 10541 (death) 48h                     | log(MBC) |
| 5  | <i>Escherichia coli</i> ATCC 25922 (growth inhibition) 24h           | log(MIC) |
| 6  | <i>Escherichia coli</i> ATCC 25922 (death) 48h                       | log(MBC) |
| 7  | <i>Klebsiella pneumoniae</i> ATCC 4352 (growth inhibition) 24h       | log(MIC) |
| 8  | <i>Klebsiella pneumoniae</i> ATCC 4352 (death) 48h                   | log(MBC) |
| 9  | <i>Micrococcus luteus</i> ATCC 9341 (growth inhibition) 24h          | log(MIC) |
| 10 | <i>Micrococcus luteus</i> ATCC 9341 (death) 48h                      | log(MBC) |
| 11 | <i>Proteus vulgaris</i> NCTC 4635 (growth inhibition) 24h            | log(MIC) |
| 12 | <i>Proteus vulgaris</i> NCTC 4635 (death) 48h                        | log(MBC) |
| 13 | <i>Pseudomonas aeruginosa</i> ATCC 27853 (growth inhibition) 24h     | log(MIC) |
| 14 | <i>Pseudomonas aeruginosa</i> ATCC 27853 (death) 48h                 | log(MBC) |
| 15 | <i>Pseudomonas aeruginosa</i> NCTC 6749 (growth inhibition) 24h      | log(MIC) |
| 16 | <i>Rhodotorula rubra</i> PhB (growth inhibition) 48h                 | log(MIC) |
| 17 | <i>Rhodotorula rubra</i> PhB (death) 5d                              | log(MBC) |
| 18 | <i>Serratia marcescens</i> ATCC 8100 (growth inhibition) 24h         | log(MIC) |
| 19 | <i>Serratia marcescens</i> ATCC 8100 (death) 48h                     | log(MBC) |
| 20 | <i>Staphylococcus aureus</i> ATCC 6538 (growth inhibition) 24h       | log(MBC) |
| 21 | <i>Staphylococcus aureus</i> ATCC 6538 (death) 48h                   | log(MIC) |
| 22 | <i>Staphylococcus aureus</i> (MRSA) (growth inhibition) 24h          | log(MIC) |
| 23 | <i>Staphylococcus aureus</i> (MRSA) (death) 48h                      | log(MBC) |
| 24 | <i>Staphylococcus aureus</i> NCTC 4163 (growth inhibition) 24h       | log(MIC) |
| 25 | <i>Staphylococcus epidermidis</i> ATCC 12228 (growth inhibition) 24h | log(MIC) |
| 26 | <i>Staphylococcus epidermidis</i> ATCC 12228 (death) 48h             | log(MBC) |





**S10:** PCA Scores Plot in the Bacteria and Fungi toxicity model for imidazolium-based ILs. S10a: anions distribution; S10b: side chains distribution. Imidazolium side chains labels in S11.

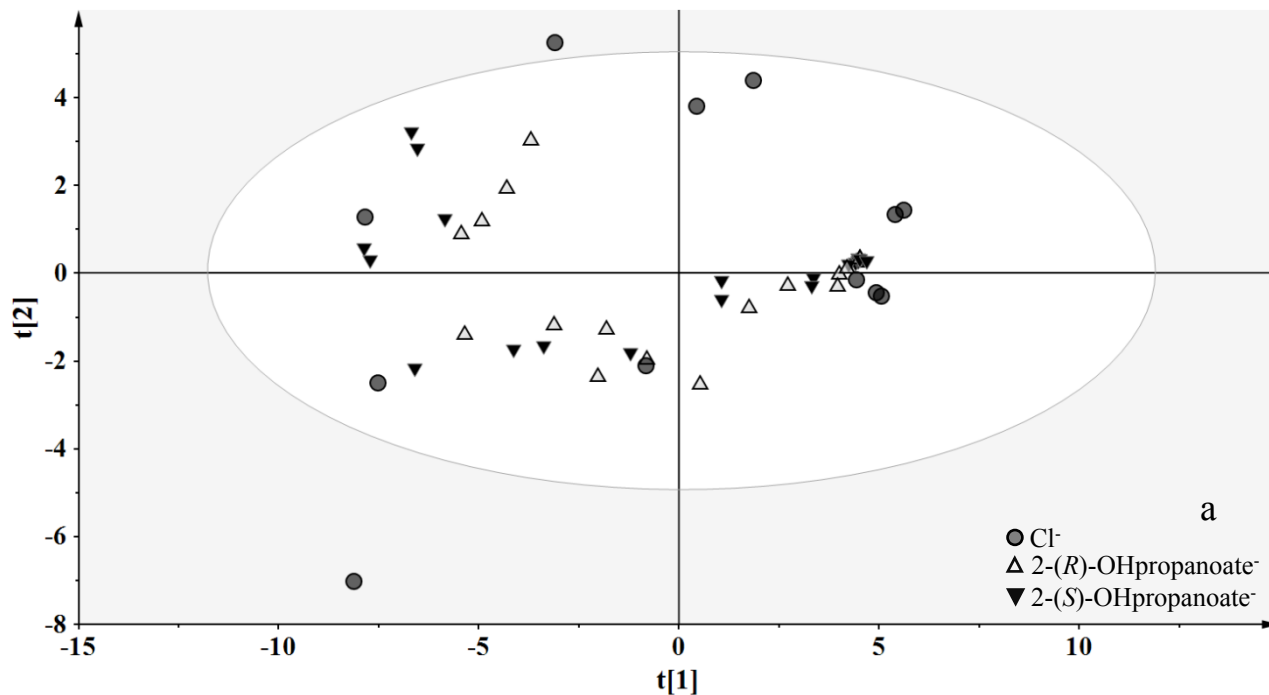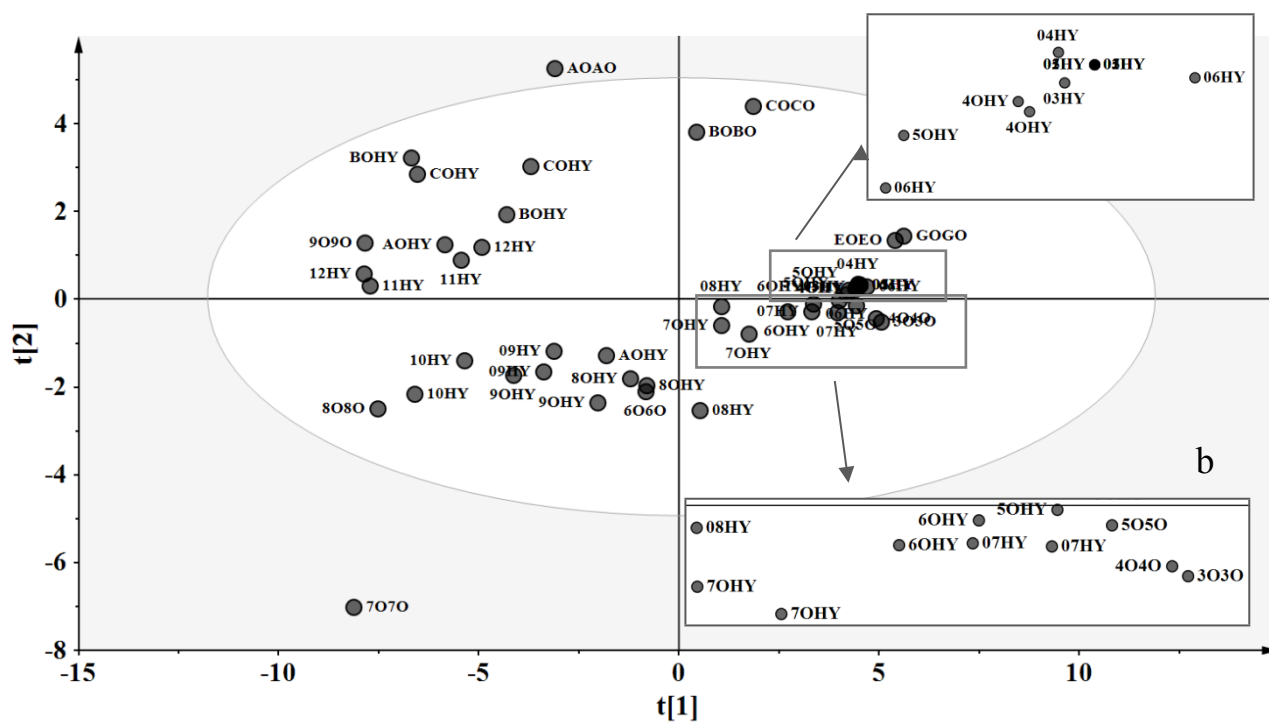

**S11: Imidazolium side chains labels**

|                             | Side chain                                                   | label |
|-----------------------------|--------------------------------------------------------------|-------|
| <i>none</i>                 | hydrogen                                                     | HY    |
|                             | methyl                                                       | 01    |
|                             | ethyl                                                        | 02    |
|                             | propyl                                                       | 03    |
|                             | 2-propenyl ( <i>allyl</i> )                                  | AL    |
|                             | 2-methylpropyl ( <i>isobutyl</i> )                           | 14    |
|                             | butyl                                                        | 04    |
|                             | pentyl                                                       | 05    |
|                             | hexyl                                                        | 06    |
|                             | heptyl                                                       | 07    |
|                             | octyl                                                        | 08    |
|                             | nonyl                                                        | 09    |
|                             | decyl                                                        | 10    |
|                             | undecyl                                                      | 11    |
|                             | dodecyl                                                      | 12    |
|                             | tridecyl                                                     | 13    |
|                             | tetradecyl                                                   | 14    |
|                             | pentadecyl                                                   | 15    |
|                             | hexadecyl                                                    | 16    |
| heptadecyl                  | 17                                                           |       |
| octadecyl                   | 18                                                           |       |
| nonadecyl                   | 19                                                           |       |
| <i>alkylic</i>              | phenylmethyl                                                 | PM    |
|                             | phenylethyl                                                  | PE    |
|                             | (4-methylphenyl)methyl                                       | MP    |
|                             | (1,3-benzodioxol-5-yl)-2-methoxy-2-oxoethyl                  | ZM    |
|                             | 1-(1,3-benzodioxol-5-yl)-2-butoxy-2-oxoethyl                 | ZB    |
|                             | 2-[1-(1,3-benzodioxol-5-yl)-2-butoxy-2-oxoethoxy]-2-oxoethyl | ZX    |
| <i>aromatic</i>             | metoxymethyl                                                 | 1O    |
|                             | etoxymethyl                                                  | 2O    |
|                             | propoxymethyl                                                | 3O    |
|                             | butoxymethyl                                                 | 4O    |
|                             | pentoxymethyl                                                | 5O    |
|                             | hexyloxymethyl                                               | 6O    |
|                             | heptyloxymethyl                                              | 7O    |
|                             | octyloxymethyl                                               | 8O    |
|                             | nonyloxymethyl                                               | 9O    |
|                             | decyloxymethyl                                               | AO    |
|                             | undecyloxymethyl                                             | BO    |
|                             | dodecyloxymethyl                                             | CO    |
|                             | tetradecyloxymethyl                                          | EO    |
|                             | hexadecyloxymethyl                                           | GO    |
| <i>alkyloxymethyl ether</i> | 2-metoxyethyl                                                | 1E    |
|                             | 2-etoxethyl                                                  | 2E    |
|                             | 2-(2-methoxyethoxy)ethyl                                     | ME    |
|                             | 3-methoxypropyl                                              | 1P    |
| <i>ether</i>                | 2-hydroxyethyl                                               | ET    |
|                             | 3-hydroxypropyl                                              | PR    |
| <i>alcoholic</i>            | 4-hydroxypropyl                                              | BL    |
|                             | 3-carboxypropyl                                              | C3    |
| <i>carboxylic</i>           |                                                              |       |
| <i>ester</i>                | 11-ethoxy-11-oxoundecyl                                      | EU    |
| <i>amidic</i>               | 2-(diethylamino)-2-oxoethyl                                  | EE    |
| <i>nitrile</i>              | cyanomethyl                                                  | CM    |
